1 **From HHV-6 reactivation to autoimmune reactivity against tight junctions and**  
2 **neuronal antigens, to inflammation, depression, and chronic fatigue syndrome due to**  
3 **Long COVID.**

4

5 Michael Maes<sup>1,2,3,4,5,6,7\*</sup> Abbas F. Almulla<sup>3,8#</sup>, Xiaoou Tang<sup>1,2</sup>, Kristina Stoyanova<sup>4,5,6</sup>,  
6 Aristo Vojdani<sup>9,10</sup>

7

8 <sup>1</sup> Sichuan Provincial Center for Mental Health, Sichuan Provincial People's Hospital, School  
9 of Medicine, University of Electronic Science and Technology of China, Chengdu 610072,  
10 China.

11 <sup>2</sup> Key Laboratory of Psychosomatic Medicine, Chinese Academy of Medical Sciences,  
12 Chengdu, 610072, China.

13 <sup>3</sup> Department of Psychiatry, Faculty of Medicine, Chulalongkorn University, and King  
14 Chulalongkorn Memorial Hospital, the Thai Red Cross Society, Bangkok, Thailand.

15 <sup>4</sup> Department of Psychiatry, Medical University of Plovdiv, Plovdiv, Bulgaria.

16 <sup>5</sup> Research Center, Medical University of Plovdiv, Plovdiv, Bulgaria.

17 <sup>6</sup> Research and Innovation Program for the Development of MU - PLOVDIV– (SRIPD-  
18 MUP), Creation of a network of research higher schools, National plan for recovery and  
19 sustainability, European Union – NextGenerationEU.

20 <sup>7</sup> Kyung Hee University, 26 Kyungheedaero, Dongdaemun-gu, Seoul 02447, Korea.

21 <sup>8</sup> Medical Laboratory Technology Department, College of Medical Technology, The Islamic  
22 University, Najaf, Iraq.

23 <sup>9</sup> Immunosciences Lab, Inc., Los Angeles, CA 90035, USA.

24 <sup>10</sup> Cyrex Laboratories, LLC, Phoenix, AZ 85034, USA.

25

26 **\*Corresponding author:**

27 Prof. Dr. Michael Maes, M.D., Ph.D.

28 Sichuan Provincial Center for Mental Health

29 Sichuan Provincial People's Hospital,

30 School of Medicine,

31 University of Electronic Science and Technology of China

32 Chengdu 610072

33 China

34 [Michael Maes Google Scholar profile](#)

35 Email: dr.michaelmaes@hotmail.com

36

37 **E-mail addresses:**

38 [dr.michaelmaes@hotmail.com](mailto:dr.michaelmaes@hotmail.com)

39 [Abbass.chem.almulla1991@gmail.com](mailto:Abbass.chem.almulla1991@gmail.com)

40 [xiaooutang@yeah.net](mailto:xiaooutang@yeah.net)

41 [Kristina.Stoyanova@mu-plovdiv.bg](mailto:Kristina.Stoyanova@mu-plovdiv.bg)

42 [drari@msn.com](mailto:drari@msn.com)

43

44

45

46

47 **Abstract**

48 **Background:** Inflammation and autoimmune responses contribute to the pathophysiology of  
49 Long COVID, and its affective and chronic fatigue syndrome (CFS) symptoms, labeled “the  
50 physio-affective phenome.”

51 **Objectives:** To investigate whether Long COVID and its physio-affective phenome are  
52 linked to autoimmunity to the tight junction proteins, zonulin and occludin (ZOOC), and  
53 immune reactivity to lipopolysaccharides (LPS), and whether the latter are associated with  
54 signs of human herpes virus-6 reactivation (HHV-6), autoimmunity directed against  
55 oligodendrocyte and neuronal proteins, including myelin basic protein (MBP).

56 **Methods:** IgA/IgM/IgG responses to Severe Acute Respiratory Syndrome Coronavirus 2  
57 (SARS-CoV-2), HHV-6, ZOOC, and neuronal proteins, C-reactive protein (CRP) and  
58 advanced oxidation protein products (AOPP), were measured in 90 Long COVID patients  
59 and 90 healthy controls. The physio-affective phenome was conceptualized as a factor  
60 extracted from physical and affective symptom domains.

61 **Results:** Neural network identified IgA directed to LPS (IgA-LPS), IgG-ZOOC, IgG-LPS,  
62 and IgA-ZOOC as the most important variables associated with Long COVID diagnosis with  
63 an area under the ROC curve of 0.755. Partial Least Squares analysis showed that 40.9% of  
64 the variance in the physio-affective phenome was explained by CRP, IgA-MPB and IgG-  
65 MBP. A large part of the variances in both autoimmune responses to MBP (36.3-39.7%) was  
66 explained by autoimmunity (IgA and IgG) directed to ZOOC. The latter was strongly  
67 associated with indicants of HHV-6 reactivation, which in turn was associated with increased  
68 IgM-SARS-CoV-2.

69 **Conclusions:** Autoimmunity against components of the tight junctions and increased  
70 bacterial translocation may be involved in the pathophysiology of Long COVID’s physio-  
71 affective phenome.

72

73 **Keywords:** Long COVID, neuroimmune, autoimmunity, chronic fatigue syndrome,

74 depression, affective disorders

75

76

77

78 **Introduction**

79           According to the latest data, it has been found that there are at least 65 million people  
80 worldwide who are affected by Long COVID disease [1]. A considerable number of  
81 individuals who have recovered from COVID-19 have reported persistent neuro-psychiatric  
82 symptoms [1, 2]. Neurological disease, encompassing both the central and peripheral nervous  
83 systems, is present in over 33% of individuals with long COVID [2-5]. Neuropsychiatric  
84 symptoms include chronic fatigue syndrome (CFS), depression, and anxiety that can last for  
85 up to 12 months after recovery [2-4].

86           In separate publications authored by some of the current authors, a validated latent  
87 vector was extracted from various neuropsychiatric symptoms such as CFS, depression, and  
88 anxiety due to Long COVID [6-8]. This latent construct was given the name the "physio-  
89 affective phenome of Long COVID." Decreased oxygen saturation (SpO<sub>2</sub>) and elevated peak  
90 body temperature (PBT) during the acute phase of illness can predict the physio-affective  
91 phenome of Long COVID [9]. Both PBT and lower SpO<sub>2</sub> are indicators that can be used to  
92 assess the severity of the immune-inflammatory response during acute infection [10].

93           Nonetheless, there remains a significant ongoing discussion regarding the underlying  
94 causes of Long COVID and the extent of its impact on individuals' physical and mental well-  
95 being, including symptoms such as CFS, depression, and anxiety. Some of the authors of the  
96 present study have discovered molecular pathways that are involved in the development of  
97 symptoms in individuals with Long COVID disease. These pathways include the activation  
98 of the immune-inflammatory system (IRS), specifically the NLRP3, M1 macrophage, T  
99 helper (Th)-1, and Th-17 activation [6-8, 11-13]. Additionally, some of these authors found  
100 activation of the compensatory immunoregulatory system, as well as oxidative and nitrosative  
101 stress reactions. Furthermore, there was an observed increase in insulin resistance, a decrease  
102 in tryptophan levels, and an increase in tryptophan catabolites, such as kynurenine [11, 12]. A

103 recent meta-analysis has found that Long COVID disease is associated with elevated levels of  
104 C-reactive protein (CRP), D-dimers, lactate dehydrogenase, leukocytes, lymphocytes, and  
105 interleukin (IL)-6 [14].

106 Emerging research suggests a potential link between the prolonged presence of Severe  
107 Acute Respiratory Syndrome Coronavirus 2 (SARS-CoV-2) and the development of Long  
108 COVID in some individuals [15-17]. In addition, Vojdani and colleagues found that Long  
109 COVID, and its physio-affective phenome exhibit elevated levels of immunoglobulins (Ig)  
110 IgG and IgM responses directed towards the spike protein of SARS-CoV-2 and Human  
111 Herpesvirus type 6 (HHV-6). This is evident from the increased IgG/IgM responses to HHV-  
112 6 and deoxyuridine 5'-triphosphate nucleotidohydrolase (HHV-6-duTPase) in Long COVID  
113 [15]. Therefore, these authors concluded that reactivation of dormant viruses could  
114 potentially contribute to the development of Long-COVID. In their study, Almulla et al. [18]  
115 found that heightened autoimmune responses, specifically those mediated by IgG and IgM to  
116 neuronal antigens, play a significant role in the development of Long COVID and the  
117 emergence of new affective and CFS symptoms. Some of the proteins mentioned in the study  
118 are myelin basic protein (MBP), myelin oligodendrocyte glycoprotein (MOG), neurofilament  
119 light (NFL), synapsin, tubulin, cerebellar protein-2, and the blood-brain barrier (BBB)  
120 proteins claudin-5 and S100B [18].

121 Thus, it can be inferred that infection with the SARS-CoV-2 virus has the potential to  
122 reactivate dormant viruses. This, in turn, may lead to heightened oxidative and nitrosative  
123 stress, weakened antioxidant defenses, activation of the immune response system, and an  
124 elevated risk of microglial activation and neuroinflammation. These processes can result in  
125 damage to neuronal cells and an increased production of antibodies targeting neuronal  
126 antigens [15, 16, 18].

127 Major depression (MDD) and CFS exhibit heightened oxidative and nitrosative stress,  
128 diminished antioxidant defenses, activation of IRS, and damage to neuronal antigens [19-22].  
129 There is evidence to suggest that both MDD and CFS are associated with symptoms of leaky  
130 gut or increased gut permeability, which can lead to bacterial translocation [23-26]. Both  
131 disorders show elevated levels of IgA and IgM antibodies to various Gram-negative gut  
132 commensal bacteria, indicating increased bacterial translocation due to leaky gut. Changes in  
133 additional biomarkers related to intestinal permeability, such as intestinal fatty acid binding  
134 protein (I-FABP), have been observed in individuals with MDD and suicidal tendencies [27].  
135 Furthermore, it has been suggested by Maes et al. [28] that there is evidence pointing towards  
136 a strong link between increased bacterial translocation in individuals with MDD and  
137 heightened IgM- and IgG-mediated autoimmune responses. Additionally, Rudzki and Maes  
138 [29] have proposed a link between leaky gut and microglial activation in MDD.

139 Abnormalities in gut permeability can be linked to disruptions in the tight junctions of  
140 the paracellular pathways, particularly occludin [26]. Several factors can disrupt the healthy  
141 barrier function of the body. These include gut dysbiosis, the use of antibiotics and  
142 immunomodulatory drugs, autoimmune responses to barrier structures, and the presence of  
143 zonulin [23-25, 30]. Zonulin, also known as pre-haptoglobin-2, plays a role in the regulation  
144 of tight junctions and, therefore, immune tolerance [31]. However, excessive production of  
145 zonulin can lead to an increase in intestinal permeability, commonly referred to as leaky gut  
146 [26, 32]. It is worth mentioning that HHV-6 infection or reactivation has been linked to  
147 gastrointestinal symptoms and infection of the gastroduodenal mucosa, as observed in studies  
148 by Halme et al. [33] and Amo et al. [34]. Therefore, it is plausible that the reactivation of  
149 HHV-6 in individuals with COVID-19 could potentially lead to gastrointestinal infection,  
150 resulting in a compromised gut barrier and the translocation of bacteria. This, in turn, may  
151 trigger autoimmune reactions targeting neuronal antigens.

152           There is still much to be discovered about the potential connection between Long  
153 COVID and indicators of leaky gut or autoimmune reactions to occludin and zonulin.  
154 Additionally, it remains unclear whether the latter are linked to signs of SARS-CoV-2  
155 persistence, HHV-6 reactivation, autoimmunity to neuronal antigens, and the physio-affective  
156 phenome of COVID-19. Therefore, the aim of this study is to investigate whether Long  
157 COVID and its physio-affective phenome are linked to heightened autoimmune reactions  
158 directed against zonulin and occludin, and whether indicants of tight junctions dysfunction is  
159 connected to the reactivation of HHV-6 and autoimmune responses targeting neuronal  
160 antigens such as MBP, MOG, cerebellar-protein-2, synapsin, tubulin, NFP, and BBB-brain  
161 damage (BBD) proteins (claudin-5 and S100B).

162

## 163 **Participants and Methods**

### 164 *Participants*

165           In the present investigation, patients were recruited based on the Long COVID  
166 disease criteria established by the World Health Organization [35] and assessed by expert  
167 clinicians. Patients with long COVID are defined as individuals who have had a confirmed  
168 COVID-19 infection (see below) and have experienced at least two of the specified  
169 symptoms for a minimum of two months after the initial infection. These symptoms include  
170 emotional distress, concentration difficulties, cognitive dysfunctions, chronic fatigue, loss of  
171 sense of smell or taste, chest discomfort, persistent cough, difficulty breathing, headache,  
172 dizziness, muscle and joint pain, sleep problems, and gastrointestinal symptoms (WHO).  
173 These symptoms may continue beyond the initial phase of SARS-CoV-2 infection or become  
174 noticeable 2-3 months after the initial infection. All patients had Long COVID symptoms that  
175 persisted for at least 3 months.



176 This study enrolled a total of 180 individuals, namely 90 individuals diagnosed with  
177 Long COVID and 90 individuals who served as controls. The study sample was used to  
178 examine the differences in biomarkers among subjects with the diagnosis of Long COVID in  
179 comparison to healthy controls. In addition, we examined the associations between the leaky  
180 gut biomarkers and either autoimmunity biomarkers or antibodies to viral antigens. Healthy  
181 control serum samples (n=76) were supplied by Innovative Research, Novi, Michigan, and  
182 Immunosciences Lab., Inc. (Los Angeles, California, USA) included 54 Long COVID  
183 patients. The Iraqi site included 14 healthy controls and 58 Long COVID patients. The  
184 diagnosis of the acute stage of COVID-19 infection was always made by expert virologists  
185 and doctors. All subjects had been diagnosed during the acute infectious phase using a  
186 positive reverse transcription real-time polymerase chain reaction (rRT-PCR) test and the  
187 detection of IgG/IgM antibodies against SARS-CoV-2. The SARS-CoV-2 IgG antibody Elisa  
188 kit (Zeus, Scientific) was used to confirm that all control samples tested negative.

189 In the 72 Iraqi individuals, we measured the effects of SpO<sub>2</sub> (Oxygen Saturation) and  
190 PBT (peak body temperature) during the acute phase of COVID-19 infection, and different  
191 rating scales to assess the physio-affective phenome of Long COVID. The Iraqi Long  
192 COVID patients received medical treatment from multiple healthcare institutions, namely  
193 Imam Sajjad Hospital, Hassan Halos Al-Hatmy Hospital for Infectious Diseases, Middle  
194 Euphrates Oncology Center, Al-Najaf Educational Hospital, and Al-Sader Medical City, all  
195 situated in Najaf, Iraq. We omitted all participants who had previously experienced chronic  
196 fatigue syndrome (CFS), major depressive episodes, dysthymia, bipolar disorder,  
197 schizophrenia, schizo-affective disorder, psycho-organic syndromes, panic disorder,  
198 generalized anxiety disorder, and substance use disorders (excluding nicotine dependence).  
199 We excluded all subjects (patients and controls) with established neuro-immune disorders  
200 such as Alzheimer's disease, multiple sclerosis, stroke, and Parkinson's disease, and systemic

201 immune disorders such as psoriasis, chronic obstructive pulmonary disease (COPD),  
202 scleroderma, chronic kidney disease, and psoriasis. We also excluded pregnant or lactating  
203 women.

204 The Ethics Committee of the College of Medical Technology at the Islamic  
205 University of Najaf in Iraq has granted authority to conduct this research (Document No:  
206 34/2023). Prior to being included in the study, all participants or their legal representatives  
207 gave written informed consent. The study's design and implementation followed the  
208 standards set by the International Conference on Harmonization of Good Clinical Practice,  
209 the Belmont Report, the Council of International Organizations of Medicine (CIOMS)  
210 Guideline, as well as ethical and privacy rules in Iraq and globally. Our institution's  
211 institutional review board adheres to the International Guidelines for the Conduct of Safe  
212 Human Research (ICH-GCP).

213

#### 214 *Clinical measurements*

215 In the Iraqi individuals, a paramedical specialist recorded PBT and SpO<sub>2</sub> during the  
216 acute infectious phase using a digital sublingual thermometer with an audible signal and an  
217 electronic oximeter, both manufactured by Shenzhen Jumper Medical Equipment Co. Ltd. An  
218 expert psychiatrist conducted interviews with all participants approximately 3-4 months after  
219 the participants had recovered from the acute phase of SARS-CoV-2 infection. Data,  
220 including socio-demographic and clinical features, were obtained in this interview from  
221 individuals who participated in this study. The severity of the Long COVID phenome was  
222 determined by calculating a principal component score extracted from 4 different affective  
223 and CFS symptom rating scales. The severity of anxiety symptoms was assessed using the  
224 Hamilton Anxiety Rating Scale (HAMA) [36]. The severity of depressive symptoms was  
225 assessed using two well-established measures: the Hamilton Depression Rating Scale [37]

226 and the Beck Depression Inventory-II (BDI) [38]. A psychiatrist utilized the Fibro-Fatigue  
227 scale to evaluate the extent of CSF [39].

228 The calculation of the body mass index (BMI) involves dividing an individual's  
229 weight (in kilograms) by the square of their height (in meters). The diagnostic criteria for  
230 Tobacco Use Disorder (TUD) were sourced from the Diagnostic and Statistical Manual of  
231 Mental Disorders, Fifth Edition (DSM-5).

232

233 *Assays*

234 Blood samples were drawn from fasting participants between 7:30 and 9:00 a.m. by  
235 venipuncture using vacutainer. The tubes were kept at room temperature for 15 minutes and  
236 then were centrifuged for 10 minutes at 2,000 RPM. The serum was separated into several  
237 smaller tubes and used in different assays.

238 Zonulin, occludin, alpha- and beta-tubulin were purchased from Abcam (Cambridge,  
239 MA, United States). Lipopolysaccharides (LPS) from *E. coli*, *Salmonella* and *Klebsiella*, and  
240 myelin basic protein (MBP) were purchased from Sigma-Aldrich (St. Louis, MO, USA).  
241 Neurofilament protein (NFP) was obtained from Bio-Techne R&D Systems (Minneapolis,  
242 MN, USA). Cerebellar protein-2 was purchased from CUSABIO (Houston, TX, USA).  
243 Myelin oligodendrocyte glycoprotein (MOG) peptide 74-96 and claudin-5 were synthesized  
244 by Biosynthesis (Lewisville, TX, USA). S100B was purchased from Antibodies (Limerick,  
245 PA, USA).

246 Zonulin and occludin at a concentration of 100 µg/mL were prepared in 0.01 M  
247 phosphate buffer saline with a pH of 7.4. These proteins were diluted 1:100 in 0.1 M  
248 carbonate buffer, pH 9.5, and 100 µL were added to wells of microtiter plates and incubated  
249 for 12 hours at room temperature followed by incubation at 4 °C for 16 h. The plates were  
250 washed three times with 200 µL of Trisbuffered saline (TBS) containing 0.05% Tween 20

251 (pH 7.4). The non-specific binding of immunoglobulins was prevented by adding 200  $\mu$ L of  
252 2% bovine serum albumin (BSA) in TBS and incubated overnight at 4 °C. Plates were washed  
253 as previously described and then serum samples (diluted 1:50 for IgA, 1:100 for IgG) in 1%  
254 BSA in TBS containing 0.05% Tween 20 (pH 7.4) were added to duplicate wells and  
255 incubated for 1 h at room temperature. Plates were washed 5 times with 0.01 M PBS buffer to  
256 remove non-specific binding of serum components to the antigens. We then added 100  
257 microliters of secondary antibodies labeled with alkaline phosphatase to each well. These  
258 antibodies (from Jackson ImmunoResearch, West Grove, PA, USA) were affinity-purified  
259 anti-human IgG Fc $\gamma$ -specific, anti-human IgM Fc $\mu$ -specific, and anti-human IgA alpha  
260 chain-specific. In this assay, the dilution in serum diluent buffer for anti-human IgG was  
261 1:800, for anti-human IgM was 1:600, and for anti-human IgA was 1:200. After incubation,  
262 washing and addition of substrate, the color development was stopped by adding 50  
263 microliters of 1 N NaOH. The intensity of the color was measured using an ELISA reader at a  
264 wavelength of 405 nm, and the indices were calculated using calibrators and control sera.  
265 Similarly, antibodies against SARS-CoV-2 superantigen, HHV-6 U24, and HHV-6 dUTPase,  
266 MBP, MOG, NFP, synapsin, cerebellar protein-2, and tubulin were measured using enzyme-  
267 linked immunosorbent assay (ELISA) as explained previously [15, 18].

268 The advanced oxidation protein products (AOPP) in serum were quantified using  
269 enzyme-linked immunosorbent assay (ELISA) kits from Nanjing Pars Biochem Co., Ltd. in  
270 Nanjing, China. The CRP latex slide test, a product manufactured by Spinreact® in  
271 Barcelona, Spain, was utilized to conduct measurements of CRP in human serum.

272

### 273 *Statistical analysis*

274 The Pearson correlation coefficients were employed to examine the associations  
275 between IgA/IgM/IgG responses to diverse antigens and neuropsychiatric symptom scores.

276 The present study employed an analysis of variance (ANOVA) to compare continuous  
277 variables across different study groups, whereas a contingency table analysis was used to  
278 examine categorical variables. In order to identify the main factors that contribute to CFS and  
279 emotional symptoms in individuals with Long COVID, we performed multivariate regression  
280 analysis, considering age, gender, and BMI as controlling variables. A manual and an  
281 automated stepwise approach was used; a p-value of 0.05 was used as the criteria for  
282 including variables, while a p-value of 0.10 was used as the criteria for excluding variables.  
283 The model's key metrics, including F, df, and p-values, as well as the total variance ( $R^2$ ) and  
284 standardized beta coefficients, were computed. We assessed the variance inflation factor  
285 (VIF) and tolerance in order to resolve any potential problems related to collinearity. In order  
286 to assess heteroskedasticity, we employed the White and modified Breusch-Pagan tests. In  
287 our study, we utilized binary logistic regression analysis to evaluate the associations between  
288 IgA/IgG/IgM responses and the diagnosis of Long COVID. We used healthy controls as the  
289 reference category. These analyses have accounted for potential confounding factors, such as  
290 age, sex, and study site. We calculated the standard error (SE), Wald statistics with p-values,  
291 the Odds ratio with 95% confidence intervals (CI), the classification table, and the  
292 Nagelkerke pseudo-R square (used to estimate the effect size). All tests were performed with  
293 a significance threshold of 0.05, using a two-tailed approach.

294 Neural networks were used to predict the diagnosis of Long COVID or the  
295 IGA/IgM/IgG responses to MBP or ZOOC as output variables and with other biomarkers  
296 serving as input variables. An automatic feedforward network model was used which  
297 consisted of either one or two hidden layers. The termination criterion was determined by  
298 observing a series of steps where the error term did not decrease any further. The models  
299 underwent training utilizing a maximum of 150 epochs in a batch-style training session. In  
300 case the output variable were two groups, we assessed the model's predictive value by

301 calculation the error, relative error, and the proportion of misclassifications. In case the  
302 output variable was a continuous score, we assessed the models' predictive accuracy by  
303 comparing projected values to observed values using the coefficient of determination ( $R^2$ ) or  
304 the derived correlation coefficient. A significance chart was utilized to highlight the  
305 importance and relative significance of the input variables in the neural network model.

306 Principal Component Analysis (PCA) was employed to achieve feature reduction. An  
307 essential aspect of validating a principal component (PC) is to ensure that the explained  
308 variance (EV) reaches or exceeds 50%. In addition, it is important to ensure that the anti-  
309 image correlation matrix meets the necessary criteria. The factorability indicators should also  
310 be carefully evaluated, with a Kaiser-Meyer-Olkin (KMO) value that exceeds 0.65. It is  
311 crucial for Bartlett's test of sphericity to yield a significant result, indicating that the variables  
312 are sufficiently correlated. Furthermore, all principal component loadings should surpass the  
313 threshold of 0.666. The statistical tests were performed using IBM's SPSS application version  
314 29, the most recent version available for Windows.

315 A comprehensive analysis was conducted using Partial Least Squares (PLS) to  
316 investigate the causal relationships between SARS-CoV-2 infection, HHV-6 reactivation,  
317 autoimmunity to ZOOC and neuronal antigens, and the phenome of Long COVID. The  
318 output variable (the physio-affective phenome) was derived from the clinical rating scale  
319 scores by extracting the first factor. A comprehensive PLS analysis is performed exclusively  
320 under certain circumstances: a) the factor extracted demonstrates satisfactory construct and  
321 convergence validity, as evidenced by a composite reliability of over 0.8, Cronbach's alpha  
322 exceeding 0.7, and an average variance extracted (AVE) of more than 0.5; b) all loadings on  
323 the latent vectors are greater than 0.65 at a significance level of  $p < 0.001$ ; c) the model  
324 exhibits a satisfactory fit, as indicated by the SRMR values being less than 0.08; d)  
325 Confirmatory Tetrad Analysis (CTA) indicates that the factor constructed is appropriately

326 characterized as a reflective model. Through the utilization of 5,000 bootstraps, we computed  
327 path coefficients along with their corresponding p-values, specific indirect effects, and total  
328 effects.

329 Two power analyses were conducted using G\*Power 3.1.9.7 to determine the  
330 minimum a priori sample size for detecting variations in logistic regression analysis (chi-  
331 square test; study part 1) and multiple regression analysis (study part 2). For study part 1, the  
332 power analysis showed that a minimum of 88 subjects is required. This calculation is based  
333 on an effect size of 0.3, a significance level (p) of 0.05, a power of 0.8, and degrees of  
334 freedom (df) equal to 1. For study part 2, the power analysis showed that a minimum of 65  
335 subjects is required when considering an effect size of 0.25 (equivalent to 20% explained  
336 variance), a significance level of 0.05, a power of 0.8, and up to 7 predictors.

337

## 338 **Results**

### 339 *Socio-demographic and clinical characteristics of Long COVID*

340 Electronic Supplementary File Table 1 shows the sociodemographic and clinical data  
341 of the controls and Long COVID patients. There were no significant differences in age, sex,  
342 education, marital state, BMI, and smoking between both study groups. SpO<sub>2</sub> was  
343 significantly lower in Long COVID as compared with controls, whilst PBT was significantly  
344 higher. All rating scale scores, including their composite score, were significantly higher in  
345 patients than in controls. The same table also shows that CRP and AOPP levels were  
346 significantly higher in patients than controls.

347

### 348 *Ig responses to LPS and ZOOC in Long COVID.*

349 **Table 1** shows the results of binary logistic regression analysis that examined the  
350 associations between IgA/IgM/IgG responses to LPS and ZOOC and Long COVID. There

351 were no significant associations between any of the Ig responses to LPS and Long COVID.  
352 All three Ig responses to ZOOC were significantly and positively associated with Long  
353 COVID. This table also shows the results of an automatic binary regression analysis that  
354 examined the effects of all six biomarkers shown in Table 1 on Long COVID. We found that  
355 Long COVID is predicted by the combined effects of IgG and IgA directed at ZOOC  
356 (Nagelkerke is 0.127).

357 Neural network analysis was employed to investigate the differentiation between  
358 Long COVID, and control groups based on the immune responses to LPS and ZOOC, both  
359 with and without immune responses to viral or neuronal antigens. The outcomes of the neural  
360 network analysis are displayed in **Table 2**. NN#1 utilizes the 6 Ig LPS and ZOOC data as  
361 input variables to differentiate between individuals with Long COVID and those without the  
362 condition. NN#1 selected the hyperbolic tangent as the activation function for the hidden  
363 layers and the identity function for the output layer. The training process involved two hidden  
364 levels, with the first layer consisting of 4 units and the second layer consisting of 3 units.  
365 Throughout the training process, the sum of squares error term was decreased, indicating  
366 improved ability of the neural network model to generalize trends. Based on the relatively  
367 constant error terms observed in the training, testing, and holdout samples, it can be  
368 concluded that the model has successfully reduced overfitting. The model's precision, as  
369 determined through cross-validation was 66.7% with an AUC ROC curve 0.755. **Figure 1**  
370 illustrates the significance and standardized significance of all six input variables. The model  
371 primarily identified IgA-LPS, IgG-ZOOC, IgG LPS, and IgA ZOOC as the input variables  
372 with the most significant predictive capabilities. In contrast, IgM LPS and IgM ZOOC had a  
373 lesser impact on the model's predictions.

374 Table 2, NN#2 utilizes the Ig LPS and ZOOC data, along with the viral antigens, as  
375 input variables to distinguish between Long COVID and control cases. Similar to NN#1, this



376 neural network utilized the hyperbolic tangent as the activation function in the hidden layer  
377 and the identity function in the output layer. The training process involved the utilization of  
378 two hidden layers. The first layer consisted of 6 units, while the second layer contained 5  
379 units. Based on the consistent relative error terms observed in the three samples (training,  
380 testing, and holdout), it can be concluded that the model does not exhibit signs of overfitting.  
381 Throughout the training process, there was a noticeable decrease in the sum of squares error  
382 term, indicating that the neural network model was able to generalize trends. The precision of  
383 the model, as determined through cross validation, was 77.4% (accuracy of the holdout  
384 sample). Additionally, the AUC ROC curve was found to be 0.863. Based on the data  
385 presented in **Figure 2**, it is evident that immune responses to HHV-6, ZOOC and LPS play a  
386 crucial role in predicting the occurrence of Long COVID compared to the control group.  
387 Following closely behind are IgM antibodies targeting ZOOC and HHV-6, IgA to SARS-  
388 CoC-2 and HHV-6 dUTPase, and LPS, and IgG to HHV-6 dUTPase and ZOOC. As such, the  
389 most important predictors of Long COVID are the leaky gut data coupled with immune  
390 responses to viral antigens, mostly HHV-6.

391 Table 2, NN#3 utilizes various immune responses as input variables, including those  
392 related to LPS, ZOOC, viral and neuronal antigens. The model was developed by reducing  
393 the number of input variables based on their relevance, as determined by the importance  
394 chart. Table 3, NN#3 presents all comprehensive network information, summary data, and  
395 confusion matrices. The results of the importance analysis are displayed in **Figure 3**. The  
396 precision of the model, when cross validated, surpassed that of NN#1 and NN#2.  
397 Specifically, it achieved an impressive 89.8% with an AUC ROC curve of 0.947. The most  
398 significant predictors of the model were IgG targeting HHV-6, BBB, MOG, synapsin, and  
399 ZOOC, IgA targeting BBB and ZOOC, and IgM targeting MBP, and HHV-6 dUPase.

400 Therefore, the combination of immune responses to viral, neuronal and ZOOC antigens are  
401 strongly associated with Long COVID.

402

#### 403 *Prediction of Comp\_PP*

404 To identify the key predictors of the Comp\_PP score, we conducted three separate  
405 multiple regression analyses. The first analysis (#1) incorporated the six IgA/IgM/IgG  
406 responses to LPS and ZOOC as independent variables. Our research revealed that IgG  
407 targeting ZOOC proved to be a noteworthy factor, accounting for 13.5% of the variability in  
408 Comp\_PP. **Figure 4** displays the partial regression of the Comp\_PP score on IgG to ZOOC,  
409 considering age, sex, and BMI. In regression #2, Table 3 included the CRP and AOPP values.  
410 The results indicated that the combination of CRP and IgG ZOOC accounted for 36.9% of the  
411 variance in Comp\_PP. Regression #3 also included the Ig responses to neuronal and viral  
412 antigens. The results show that 41.6% of the variance in Comp\_PP was explained by the  
413 combined effects of CRP, IgG MPB, and IgA MBP. Therefore, once the MBP data was  
414 entered, the significance of IgG ZOOC effects diminished. It is possible that the effects of  
415 IgG on Comp\_PP are influenced by autoimmunity to MBP. Therefore, we have conducted a)  
416 an analysis on the most accurate indicators of the autoimmune reactions to MBP (utilizing  
417 leaky gut and viral antigens) and ZOOC (employing the viral antigens); and b) mediation  
418 analyses whereby the effects of leaky gut on Comp\_PP are mediated by autoimmunity to  
419 MBP.

420

#### 421 *Prediction of autoimmunity to MBP and ZOOC*

422 We employed neural networks to accurately predict autoimmunity to MBP. The final  
423 calculation involved the combination of z-scores for IgA MBP, IgM MBP, and IgG MBP to  
424 create a composite score labeled as Comp\_MBP. **Table 4**, NN#1 utilizes Comp\_MBP as the

425 output variable, with the immune responses to LPS, ZOOC, and viral antigens serving as the  
426 input variables. The model was trained using a configuration that included two hidden layers,  
427 with 5 and 4 units, respectively. The hidden layer in this model utilized the hyperbolic  
428 tangent activation function, while the output layer used the identity function. The error was  
429 greatly reduced through training. The error terms remained consistent across the training,  
430 testing, and holdout sample, suggesting that the model effectively mitigated overfitting. The  
431 precision, as determined through cross-validation, was found to be 0.750. This value  
432 represents the correlation coefficient, which indicates the strength of the relationship between  
433 the predicted and observed values. The relevance chart in **Figure 5** demonstrates the model's  
434 assignment of predictive power to IgA, IgM, and IgG ZOOC, with IgA LPS following  
435 somewhat behind. The significance of the IgM/IgG LPS and viral antigen data was  
436 considerably lower.

437 We have also examined the associations between the autoimmunity directed to ZOOC  
438 and BBB (both conceptualized as z unit composites based on IgA + IgG + IgM values). There  
439 was a significant correlation between both ZOOC and BBB responses ( $r=0.765$ ,  $p<0.001$ ,  
440  $n=180$ ). There were also significant correlations between all IgA/IgM/IgG responses to  
441 ZOOC and BBB (all at  $p<0.05$ ) except between IgA-ZOOC and IgG-BBB ( $p=0.07$ ,  $p=180$ ).

442 Table 4, NN#2 uses Comp\_ZOOC as output. This output is calculated by adding up  
443 the sums of the z scores of the IgA, IgM, and IgG scores, resulting in a z unit-based  
444 composite score. The input variables consisted of various immune responses to all viral  
445 antigens. Table 4, NN#2 displays comprehensive network information, including summary  
446 data and confusion matrices. The model's precision, as determined through cross validation,  
447 was 0.719 (correlation coefficient between predicted versus observed values). Based on  
448 **Figure 6**, it can be observed that the autoimmunity targeting ZOOC is most accurately

449 predicted by the IgA/IgM/IgG reactions to HHV-6. On the other hand, the immune responses  
450 to HHV-6 dUTPase and SARS-CoV-2 have significantly lesser significance in this context.

451

452 *Results of PLS analysis.*

453 We have conducted PLS analysis to explore the potential causal pathways between  
454 SARS-CoV-2 infection and the development of Long COVID. We employed a theoretical  
455 framework rooted in the theory outlined in our Introduction, and the results shown in Tables  
456 3 and 4. This theory suggests that the SARS-CoV-2 infection could potentially reactivate  
457 HHV-6, leading to a condition known as leaky gut. This, in turn, may trigger autoimmune  
458 responses to neuronal antigens and inflammation. Collectively, these factors may be linked to  
459 the phenome. As a result, the PLS model produced the Long COVID phenome, which was  
460 derived as a factor extracted from the FF, BDI, HAMD, and HAMA scores. The phenome  
461 was predicted based on the analysis of immune responses to neuronal antigens and CRP  
462 levels. In addition, the immune responses to ZOOC and viral antigens were used to predict  
463 the neuronal data and CRP, while the HHV-6 assessments were used to predict the  
464 autoimmune responses to ZOOC. A latent variable called HHV-6 reactivation was created by  
465 extracting a factor from the IgA/IgM/IgG to HHV-6 and IgM to HHV-6 dUTPase. It is worth  
466 noting that the IgA/IgG responses to HHV-6 dUTPase did not have a significant impact on  
467 this factor. The data quality of this model was more than sufficient. a) The model fit indicated  
468 an SRMR of 0.059; b) the factors demonstrated Cronbach's alpha values of 0.749 (HHV6)  
469 and 0.898 (phenome), with composite reliability values of 0.842 and 0.929, respectively; c)  
470 CTA analysis confirmed that both factors were accurately specified as reflective models; and  
471 d) The HTMT ratios indicated the presence of discriminant validity (all HTMT values were <  
472 0.735). Our analysis revealed that CRP and IgA/IgG directed at MBP accounted for 40.9% of  
473 the variance in the Long COVID phenome. A significant portion of the data in these MBP

474 findings was elucidated through regression analysis on the levels of IgA and/or IgG to  
475 ZOOC. The latter were predicted by the HHV-6 factor, which was found to be associated  
476 with IgM SARS-CoV-2. As such, we constructed a complex multi-step mediation model.  
477 Significant predictors of the phenome were found in the analyses of total effects. Specifically,  
478 SARS-CoV-2 ( $t=2.46$ ,  $p=0.007$ ), HHV-6 factor ( $t=2.42$ ,  $p=0.008$ ), IgG to ZOOC ( $t=4.36$ ,  
479  $p<0.001$ ), and IgA to ZOOC ( $t=2.41$ ,  $p=0.008$ ) demonstrated noteworthy associations. The  
480 impact of SARS-CoV-2 was partially influenced by the pathway from HHV-6 to IgG ZOOC  
481 to IgG MBP, ultimately affecting the phenome ( $t=2.00$ ,  $p=0.023$ ). The impact of HHV-6 on  
482 the phenome was observed through the pathway from IgG ZOOC to IgG MBP, resulting in  
483 significant effects ( $t=1.98$ ,  $p=0.024$ ). The effects of IgG ZOOC were observed through the  
484 pathway from IgG MBP to the phenome ( $t=3.41$   $p<0.001$ ), and the pathway from IgG ZOOC  
485 to IgA MBP to CRP to the phenome ( $t=1.66$ ,  $p=0.049$ ). The effects of IgA ZOOC on the  
486 phenome were found to be mediated by the path from IgA MBP to CRP, with a statistically  
487 significant t-value of 1.86 and a p-value of 0.031.

488

## 489 **Discussion**

### 490 *The paracellular pathway and Long COVID*

491 The first major finding of this study is that Long COVID and its physio-affective  
492 phenome exhibit dysfunctions in the paracellular pathway. This is evident through the  
493 heightened IgA/IgM/IgG-mediated autoimmune responses to zonulin and occludin.  
494 Furthermore, the analysis conducted using neural networks revealed that the levels of IgA  
495 targeting LPS combined with IgG targeting zonulin + occludin exhibited the highest  
496 predictive accuracy for Long COVID. It can be inferred that the development of leaky gut  
497 and bacterial translocation are factors contributing to Long COVID and its physio-affective  
498 symptoms.

499 In previous studies, it was noted that MDD and CFS both exhibit indications of  
500 heightened leaky gut and bacterial translocation, as determined by levels of IgA/IgM  
501 antibodies targeting gut commensal Gram-negative bacteria [23, 24]. Research conducted by  
502 Madison et al. [40] found that women who have successfully overcome breast cancer  
503 displayed higher levels of depression, in association with an increase in indicators of  
504 inflammation and gut permeability. The latter was determined through the use of  
505 lipopolysaccharide binding protein (LBP) as an assessment tool. Patients with inflammatory  
506 bowel disease often experience depression, which is indicated by various markers of leaky  
507 gut such as calprotectin and LBP [41]. There have been studies conducted on MDD and CFS  
508 that have found evidence of gut dysbiosis endotypes, which suggest an association with  
509 increased gut permeability and pro-inflammatory potential [42-46].

510 It is worth mentioning that in hospitalized COVID-19 patients, there was a correlation  
511 between elevated zonulin levels and signs of IRS activation, as well as a poorer outcome,  
512 including mortality [47]. Research conducted by Ghoshal and Ghoshal [48] suggest that  
513 individuals who have been affected by Long COVID have a higher likelihood of developing  
514 irritable bowel syndrome when compared to normal volunteers. A study utilizing Mendelian  
515 randomization demonstrated that various taxa of gut microbiota may potentially play a causal  
516 role in the development of Long COVID [49]. A separate study conducted by Su et al. [50]  
517 revealed the presence of distinct gut-microbiome enterotypes in individuals with Long  
518 COVID and its associated symptoms. In a study conducted by Mussabay et al. [51], it was  
519 found that individuals with Long COVID exhibited a notable change in their microbiome  
520 composition. Specifically, there was an observed shift towards a pro-inflammatory profile,  
521 characterized by an increased abundance of *Bacteroides*, *Faecalibacterium*, and *Prevotella*.

522

523 *Gut tight junctions and the BBB.*

524           The second major finding is that, in our study, a noteworthy correlation was observed  
525 between the autoimmune responses to tight junctions (zonulin and occludin) and the BBB  
526 (claudin and S100B). There is evidence suggesting potential damage to the BBB in COVID-  
527 19, as indicated by studies [52] and [53]. Higher levels of S100B in COVID-19 patients have  
528 been linked to the severity of their illness, indicating a potential increase in BBB permeability  
529 and potential brain damage [54]. It is worth noting that Long COVID patients may exhibit  
530 elevated levels of autoantibodies to claudin [55] and that the tight junctions of the endothelial  
531 cells of the BBB effectively prevent blood-borne factors from entering the brain [56].  
532 Occludin and claudins play a crucial role in the tight junctions of the BBB. Interestingly,  
533 there are certain similarities in the regulation of tight junctions between the gut and the BBB  
534 [31, 56]. Furthermore, preclinical studies and studies conducted in laboratory settings indicate  
535 that zonulin may have the potential to influence the BBB [56]. However, it is important to  
536 note that this effect may not be observable in humans [57].

537

538 *HHV-6 reactivation and autoimmunity to gut tight junctions.*

539           The third major finding of this study is the strong association between HHV-6  
540 reactivation (measured by HHV-6 and HHV-6 dUTPase IgA/IgM/IgG levels) and biomarkers  
541 indicating abnormalities in the gut tight junction. Previous studies have indicated that HHV-6  
542 can have an impact on the gut mucosa. As an illustration, in the case of inflammatory bowel  
543 disease, HHV-6 is commonly found in inflamed mucosa and is linked to the histological  
544 disease activity and endoscopic severity of IBD [58-60]. In patients experiencing severe  
545 diarrhea after stem cell transplantation, it has been observed that HHV-6B DNA can be found  
546 in both peripheral blood mononuclear cells and large intestine tissues [59]. This suggests that  
547 HHV-6 may reactivate and infect goblet cells and histiocytes, as discovered by Amo et al.  
548 [34]. Cells positive for HHV-6 can be identified in the gastroduodenal mucosa of both

549 immunocompetent dyspeptic patients and liver transplant recipients, as demonstrated by  
550 Halme et al. [33].

551

552 *From aberrations in tight junction to autoimmunity against neuronal antigens*

553 Another important discovery from this study is the strong link between abnormalities  
554 in the tight junctions and increased levels of IgG/IgA/IgM-mediated autoimmunity towards  
555 neuronal antigens. This, in turn, has a significant impact on the physio-affective phenome. In  
556 a previous study, it was demonstrated that patients with MDD exhibit elevated levels of  
557 serum IgA to Gram-negative bacteria in association with increased IgG reactivity to oxidized  
558 low density lipoprotein cholesterol [28]. Furthermore, in CFS, there have been notable  
559 findings regarding the correlation between heightened indicators of bacterial translocation  
560 and elevated levels of serum IgA directed towards serotonin [61]. In both disorders, there was  
561 an observed increase in bacterial translocation, which was found to be linked to various  
562 inflammatory biomarkers. These biomarkers included lysozyme, interleukin-1 $\beta$ , and tumor  
563 necrosis factor [25, 28, 61]. Additionally, there was an association between increased  
564 bacterial translocation and increases in IgM responses to oxidatively modified epitopes and  
565 nitroso-adducts [28, 62]. Overall, there seem to be significant connections between gut  
566 barrier function and immune responses to neuronal and other antigens in Long COVID, its  
567 physio-affective phenome, MDD, and CFS [this study,[28, 61]].

568 In summary, the presence of a leaky gut and bacterial translocation could potentially  
569 play a significant role in the development of autoimmunity caused by COVID-19 and Long  
570 COVID. It has been observed that dysfunctions in the tight junctions can lead to increased  
571 bacterial translocation, which has been linked to the development of autoimmune responses  
572 and autoimmune disease [63]. An increased movement of luminal contents, such as  
573 microbiota, into the blood plays a key role in the development or worsening of human



574 autoimmune disorders [24, 31, 63]. Especially, the translocation into the blood of gut  
575 microbes with components that have structural relatedness with the tissues or cells of the  
576 human host are involved in this process, labeled molecular mimicry [24, 31, 63]. The factors  
577 that can lead to the production of cross-reactive antibodies include various components such  
578 as LPS from Gram-negative enterobacteria, bacterial cytolethal distending toxin (CDT),  
579 Gram-positive bacteria, and various viruses [64-67]. There are distinct mechanisms by which  
580 pathogens can trigger the development of autoimmune processes. These include molecular  
581 mimicry, the exposure of cryptic antigens, superantigens, and bystander activation [68, 69].  
582 Therefore, it may be concluded that leaky gut and resulting autoimmunity play a role in the  
583 pathophysiology of Long COVID, particularly in its physio-affective phenome. This is  
584 connected to various pathways such as IRS activation, NLRP3 inflammasome activation,  
585 oxidative stress, nitrosative stress, and more (see Introduction).

586

## 587 Conclusions

588 This study shows that increased autoimmunity against components of the tight  
589 junctions as well as increased IgA levels to LPS of Gram-negative bacteria play a role in  
590 Long COVID and in its physio-affective phenome. Moreover, the responsivity to the tight  
591 junctions is associated with autoimmunity to neuronal antigens and the BBB. It may be  
592 suggested that dysfunctions in gut tight junctions caused by viral persistence or reactivation  
593 can lead to an increased entry of gut microbes into the bloodstream. These microbes, through  
594 structural similarities and molecular mimicry, or other mechanisms, can trigger cross-  
595 reactivity and subsequent autoimmune responses against the body's self-epitopes or modified  
596 neo-epitopes. These processes also lead to the activation of the IRS, inflammation, oxidative  
597 stress, nitrosative stress, and increased autoimmune responses to inflammation- and

598 oxidatively modified neo-epitopes. All those factors together determine the physio-affective  
599 phenome of Long-COVID.

600

### 601 **Acknowledgments**

602 The authors are grateful to the contributors from all institutions and hospitals mentioned in  
603 this study for their support in the data collection process.

604

### 605 **Ethical approval and consent to participate.**

606 The Ethics Committee of the College of Medical Technology at the Islamic University of  
607 Najaf, Iraq, granted approval for this investigation (Document No. 34/2023). All procedures  
608 were consistent with Iraqi and international standards. Written informed assent was obtained  
609 from both patients and controls.

610

### 611 **Declaration of interest**

612 The authors have no conflicts of interest to declare.

613

### 614 **Funding**

615 Funding for the project was provided by the C2F program at Chulalongkorn University in  
616 Thailand, grant number 64.310/436/2565 to AFA, the Thailand Science Research, and  
617 Innovation Fund at Chulalongkorn University (HEA663000016), and a Sompoch Endowment  
618 Fund (Faculty of Medicine) MDCU (RA66/016) to MM.

619

### 620 **Author's contributions**

621 AA and AV were responsible for blood sample collection and other patient-related  
622 tasks. Biomarker quantification in the serum was performed by AV and AFA. MM handled

623 the statistical evaluation of the study. The manuscript was composed by MM and refined by  
624 AFA, AV, and XT with all authors reviewing and endorsing the last version.

625

626 **Availability of data**

627 After receiving a suitable request and once the author has extensively analyzed the data, the  
628 lead author (MM) is willing to grant access to the SPSS file linked to this study.

629

630

631 References

- 632 [1] Davis HE, McCorkell L, Vogel JM, Topol EJ. Long COVID: major findings, mechanisms and  
633 recommendations. *Nat Rev Microbiol.* 2023;21(3):133-46. [https://doi.org/10.1038/s41579-](https://doi.org/10.1038/s41579-022-00846-2)  
634 [022-00846-2](https://doi.org/10.1038/s41579-022-00846-2).
- 635 [2] Premraj L, Kannapadi NV, Briggs J, Seal SM, Battaglini D, Fanning J, et al. Mid and long-term  
636 neurological and neuropsychiatric manifestations of post-COVID-19 syndrome: A meta-  
637 analysis. *J Neurol Sci.* 2022;434:120162. <https://doi.org/10.1016/j.jns.2022.120162>.
- 638 [3] Lopez-Leon S, Wegman-Ostrosky T, Perelman C, Sepulveda R, Rebolledo PA, Cuapio A, et al.  
639 More than 50 long-term effects of COVID-19: a systematic review and meta-analysis.  
640 *Scientific Reports.* 2021;11(1):16144. <https://doi.org/10.1038/s41598-021-95565-8>.
- 641 [4] Groff D, Sun A, Ssentongo AE, Ba DM, Parsons N, Poudel GR, et al. Short-term and Long-term  
642 Rates of Postacute Sequelae of SARS-CoV-2 Infection: A Systematic Review. *JAMA Netw*  
643 *Open.* 2021;4(10):e2128568. <https://doi.org/10.1001/jamanetworkopen.2021.28568>.
- 644 [5] Stefanou M-I, Palaiodimou L, Bakola E, Smyrnis N, Papadopoulou M, Paraskevas GP, et al.  
645 Neurological manifestations of long-COVID syndrome: a narrative review. *Therapeutic*  
646 *Advances in Chronic Disease.* 2022;13:20406223221076890.  
647 <https://doi.org/10.1177/20406223221076890>.
- 648 [6] Al-Hakeim HK, Al-Rubaye HT, Almulla AF, Al-Hadrawi DS, Maes M. Chronic Fatigue,  
649 Depression and Anxiety Symptoms in Long COVID Are Strongly Predicted by Neuroimmune  
650 and Neuro-Oxidative Pathways Which Are Caused by the Inflammation during Acute  
651 Infection. In: *Journal of Clinical Medicine.* 12. 2023.
- 652 [7] Al-Hakeim HK, Al-Rubaye HT, Al-Hadrawi DS, Almulla AF, Maes M. Long-COVID post-viral  
653 chronic fatigue and affective symptoms are associated with oxidative damage, lowered  
654 antioxidant defenses and inflammation: a proof of concept and mechanism study. *Molecular*  
655 *Psychiatry.* 2022. <https://doi.org/10.1038/s41380-022-01836-9>.
- 656 [8] Maes M, Al-Rubaye HT, Almulla AF, Al-Hadrawi DS, Stoyanova K, Kubera M, et al. Lowered  
657 Quality of Life in Long COVID Is Predicted by Affective Symptoms, Chronic Fatigue Syndrome,  
658 Inflammation and Neuroimmunotoxic Pathways. In: *International Journal of Environmental*  
659 *Research and Public Health.* 19. 2022.
- 660 [9] Al-Hadrawi DS, Al-Rubaye HT, Almulla AF, Al-Hakeim HK, Maes M. Lowered oxygen  
661 saturation and increased body temperature in acute COVID-19 largely predict chronic fatigue  
662 syndrome and affective symptoms due to Long COVID: A precision nomothetic approach.  
663 *Acta Neuropsychiatrica.* 2022;1-12. <https://doi.org/10.1017/neu.2022.21>.
- 664 [10] Al-Jassas HK, Al-Hakeim HK, Maes M. Intersections between pneumonia, lowered oxygen  
665 saturation percentage and immune activation mediate depression, anxiety, and chronic  
666 fatigue syndrome-like symptoms due to COVID-19: A nomothetic network approach. *J Affect*  
667 *Disord.* 2022;297:233-45. <https://doi.org/10.1016/j.jad.2021.10.039>.
- 668 [11] Al-Hakeim HK, Khairi Abed A, Rouf Moustafa S, Almulla AF, Maes M. Tryptophan catabolites,  
669 inflammation, and insulin resistance as determinants of chronic fatigue syndrome and  
670 affective symptoms in long COVID. *Frontiers in Molecular Neuroscience.* 2023;16.
- 671 [12] Al-Hakeim HK, Abed AK, Almulla AF, Rouf Moustafa S, Maes M. Anxiety due to Long COVID is  
672 partially driven by activation of the tryptophan catabolite (TRYCAT) pathway. *Asian Journal*  
673 *of Psychiatry.* 2023;88:103723. [https://doi.org/https://doi.org/10.1016/j.ajp.2023.103723](https://doi.org/10.1016/j.ajp.2023.103723).
- 674 [13] Abbas FA, Yanin T, Bo Z, Aristo V, Michael M. Immune activation and immune-associated  
675 neurotoxicity in Long-COVID: A systematic review and meta-analysis of 82 studies  
676 comprising 58 cytokines/chemokines/growth factors. *medRxiv.* 2024:2024.02.08.24302516.  
677 <https://doi.org/10.1101/2024.02.08.24302516>.
- 678 [14] Yong SJ, Halim A, Halim M, Liu S, Aljeldah M, Al Shammari BR, et al. Inflammatory and  
679 vascular biomarkers in post-COVID-19 syndrome: A systematic review and meta-analysis of

- 680 over 20 biomarkers. *Reviews in Medical Virology*. 2023;33(2):e2424.  
681 <https://doi.org/https://doi.org/10.1002/rmv.2424>.
- 682 [15] Vojdani A, Almulla AF, Zhou B, Al-Hakeim HK, Maes M. Reactivation of herpesvirus type 6  
683 and IgA/IgM-mediated responses to activin-A underpin long COVID, including affective  
684 symptoms and chronic fatigue syndrome. *Acta Neuropsychiatr*. 2024:1-13.  
685 <https://doi.org/10.1017/neu.2024.10>.
- 686 [16] Vojdani A, Vojdani E, Saidara E, Maes M. Persistent SARS-CoV-2 Infection, EBV, HHV-6 and  
687 Other Factors May Contribute to Inflammation and Autoimmunity in Long COVID. In: *Viruses*.  
688 15. 2023.
- 689 [17] Su Y, Yuan D, Chen DG, Ng RH, Wang K, Choi J, et al. Multiple early factors anticipate post-  
690 acute COVID-19 sequelae. *Cell*. 2022;185(5):881-95.e20.  
691 <https://doi.org/10.1016/j.cell.2022.01.014>.
- 692 [18] Almulla AF, Maes M, Bo Z, Hussein KA-H, Aristo V. Brain-targeted autoimmunity is strongly  
693 associated with Long COVID and its chronic fatigue syndrome as well as its affective  
694 symptoms. *medRxiv*. 2023:2023.10.04.23296554.  
695 <https://doi.org/10.1101/2023.10.04.23296554>.
- 696 [19] Morris G, Maes M. Oxidative and Nitrosative Stress and Immune-Inflammatory Pathways in  
697 Patients with Myalgic Encephalomyelitis (ME)/Chronic Fatigue Syndrome (CFS). *Curr*  
698 *Neuropharmacol*. 2014;12(2):168-85.  
699 <https://doi.org/10.2174/1570159X11666131120224653>.
- 700 [20] Morris G, Maes M. Myalgic encephalomyelitis/chronic fatigue syndrome and  
701 encephalomyelitis disseminata/multiple sclerosis show remarkable levels of similarity in  
702 phenomenology and neuroimmune characteristics. *BMC Medicine*. 2013;11(1):205.  
703 <https://doi.org/10.1186/1741-7015-11-205>.
- 704 [21] Maes M, Carvalho AF. The Compensatory Immune-Regulatory Reflex System (CIRS) in  
705 Depression and Bipolar Disorder. *Mol Neurobiol*. 2018;55(12):8885-903.  
706 <https://doi.org/10.1007/s12035-018-1016-x>.
- 707 [22] Almulla AF, Abbas Abo Algon A, Tunvirachaisakul C, Al-Hakeim HK, Maes M. T helper-1  
708 activation via interleukin-16 is a key phenomenon in the acute phase of severe, first-episode  
709 major depressive disorder and suicidal behaviors. *J Adv Res*. 2023.  
710 <https://doi.org/10.1016/j.jare.2023.11.012>.
- 711 [23] Maes M, Mihaylova I, Leunis JC. Increased serum IgA and IgM against LPS of enterobacteria  
712 in chronic fatigue syndrome (CFS): indication for the involvement of gram-negative  
713 enterobacteria in the etiology of CFS and for the presence of an increased gut-intestinal  
714 permeability. *J Affect Disord*. 2007;99(1-3):237-40.  
715 <https://doi.org/10.1016/j.jad.2006.08.021>.
- 716 [24] Maes M, Kubera M, Leunis JC. The gut-brain barrier in major depression: intestinal mucosal  
717 dysfunction with an increased translocation of LPS from gram negative enterobacteria (leaky  
718 gut) plays a role in the inflammatory pathophysiology of depression. *Neuro Endocrinol Lett*.  
719 2008;29(1):117-24.
- 720 [25] Simeonova D, Stoyanov D, Leunis JC, Carvalho AF, Kubera M, Murdjeva M, et al. Increased  
721 Serum Immunoglobulin Responses to Gut Commensal Gram-Negative Bacteria in Unipolar  
722 Major Depression and Bipolar Disorder Type 1, Especially When Melancholia Is Present.  
723 *Neurotox Res*. 2020;37(2):338-48. <https://doi.org/10.1007/s12640-019-00126-7>.
- 724 [26] Simeonova D, Ivanovska M, Murdjeva M, Carvalho AF, Maes M. Recognizing the Leaky Gut as  
725 a Trans-diagnostic Target for Neuroimmune Disorders Using Clinical Chemistry and  
726 Molecular Immunology Assays. *Curr Top Med Chem*. 2018;18(19):1641-55.  
727 <https://doi.org/10.2174/1568026618666181115100610>.
- 728 [27] Ohlsson L, Gustafsson A, Lavant E, Suneson K, Brundin L, Westrin Å, et al. Leaky gut  
729 biomarkers in depression and suicidal behavior. *Acta Psychiatr Scand*. 2019;139(2):185-93.  
730 <https://doi.org/10.1111/acps.12978>.

- 731 [28] Maes M, Kubera M, Leunis JC, Berk M, Geffard M, Bosmans E. In depression, bacterial  
732 translocation may drive inflammatory responses, oxidative and nitrosative stress (O&NS),  
733 and autoimmune responses directed against O&NS-damaged neoepitopes. *Acta Psychiatrica*  
734 *Scandinavica*. 2013;127(5):344-54. [https://doi.org/https://doi.org/10.1111/j.1600-](https://doi.org/https://doi.org/10.1111/j.1600-0447.2012.01908.x)  
735 [0447.2012.01908.x](https://doi.org/https://doi.org/10.1111/j.1600-0447.2012.01908.x).
- 736 [29] Rudzki L, Maes M. The Microbiota-Gut-Immune-Glia (MGIG) Axis in Major Depression. *Mol*  
737 *Neurobiol*. 2020;57(10):4269-95. <https://doi.org/10.1007/s12035-020-01961-y>.
- 738 [30] Vojdani A, Vojdani E, Kharrazian D. Fluctuation of zonulin levels in blood vs stability of  
739 antibodies. *World J Gastroenterol*. 2017;23(31):5669-79.  
740 <https://doi.org/10.3748/wjg.v23.i31.5669>.
- 741 [31] Vojdani A, Vojdani E. Food-associated autoimmunities: when food breaks your immune  
742 system. A&G Press; 2019.
- 743 [32] Fasano A. Intestinal permeability and its regulation by zonulin: diagnostic and therapeutic  
744 implications. *Clin Gastroenterol Hepatol*. 2012;10(10):1096-100.  
745 <https://doi.org/10.1016/j.cgh.2012.08.012>.
- 746 [33] Halme L, Arola J, Höckerstedt K, Lautenschlager I. Human Herpesvirus 6 Infection of the  
747 Gastroduodenal Mucosa. *Clinical Infectious Diseases*. 2008;46(3):434-9.  
748 <https://doi.org/10.1086/525264>.
- 749 [34] Amo K, Tanaka-Taya K, Inagi R, Miyagawa H, Miyoshi H, Okusu I, et al. Human herpesvirus 6B  
750 infection of the large intestine of patients with diarrhea. *Clin Infect Dis*. 2003;36(1):120-3.  
751 <https://doi.org/10.1086/345464>.
- 752 [35] World Health Organization W. A clinical case definition of post COVID-19 condition by a  
753 Delphi consensus
- 754 6 October. WHO. 2021.
- 755 [36] Hamilton M. The assessment of anxiety states by rating. *Br J Med Psychol*. 1959;32(1):50-5.  
756 <https://doi.org/10.1111/j.2044-8341.1959.tb00467.x>.
- 757 [37] Hamilton M. A rating scale for depression. *J Neurol Neurosurg Psychiatry*. 1960;23(1):56-62.  
758 <https://doi.org/10.1136/jnnp.23.1.56>.
- 759 [38] Hautzinger MKFKhCBATSRABGK. Beck Depressions-Inventar : BDI-II ; Revision ; Manual.  
760 Frankfurt am Main: Pearson; 2009.
- 761 [39] Zachrisson O, Regland B, Jahreskog M, Kron M, Gottfries CG. A rating scale for fibromyalgia  
762 and chronic fatigue syndrome (the FibroFatigue scale). *Journal of Psychosomatic Research*.  
763 2002;52(6):501-9. [https://doi.org/https://doi.org/10.1016/S0022-3999\(01\)00315-4](https://doi.org/https://doi.org/10.1016/S0022-3999(01)00315-4).
- 764 [40] Madison AA, Andridge R, Kantaras AH, Renna ME, Bennett JM, Alfano CM, et al. Depression,  
765 Inflammation, and Intestinal Permeability: Associations with Subjective and Objective  
766 Cognitive Functioning throughout Breast Cancer Survivorship. *Cancers (Basel)*. 2023;15(17).  
767 <https://doi.org/10.3390/cancers15174414>.
- 768 [41] Iordache MM, Tocia C, Aschie M, Dumitru A, Manea M, Cozaru GC, et al. Intestinal  
769 Permeability and Depression in Patients with Inflammatory Bowel Disease. *J Clin Med*.  
770 2022;11(17). <https://doi.org/10.3390/jcm11175121>.
- 771 [42] Maes M, Vasupanrajit A, Jirakran K, Klomkiew P, Chanchaem P, Tunvirachaisakul C, et al.  
772 Adverse childhood experiences and reoccurrence of illness impact the gut microbiome,  
773 which affects suicidal behaviours and the phenome of major depression: towards  
774 enterotypic phenotypes. *Acta Neuropsychiatr*. 2023;35(6):328-45.  
775 <https://doi.org/10.1017/neu.2023.21>.
- 776 [43] Stallmach A, Quickert S, Puta C, Reuken PA. The gastrointestinal microbiota in the  
777 development of ME/CFS: a critical view and potential perspectives. *Front Immunol*.  
778 2024;15:1352744. <https://doi.org/10.3389/fimmu.2024.1352744>.
- 779 [44] Wang JH, Choi Y, Lee JS, Hwang SJ, Gu J, Son CG. Clinical evidence of the link between gut  
780 microbiome and myalgic encephalomyelitis/chronic fatigue syndrome: a retrospective  
781 review. *Eur J Med Res*. 2024;29(1):148. <https://doi.org/10.1186/s40001-024-01747-1>.

- 782 [45] Chen CY, Wang YF, Lei L, Zhang Y. Impacts of microbiota and its metabolites through gut-  
783 brain axis on pathophysiology of major depressive disorder. *Life Sci.* 2024;351:122815.  
784 <https://doi.org/10.1016/j.lfs.2024.122815>.
- 785 [46] Tao K, Yuan Y, Xie Q, Dong Z. Relationship between human oral microbiome dysbiosis and  
786 neuropsychiatric diseases: An updated overview. *Behavioural Brain Research.* 2024:115111.
- 787 [47] Palomino-Kobayashi LA, Ymaña B, Ruiz J, Mayanga-Herrera A, Ugarte-Gil MF, Pons MJ.  
788 Zonulin, a marker of gut permeability, is associated with mortality in a cohort of hospitalised  
789 peruvian COVID-19 patients. *Front Cell Infect Microbiol.* 2022;12:1000291.  
790 <https://doi.org/10.3389/fcimb.2022.1000291>.
- 791 [48] Ghoshal UC, Ghoshal U. Gastrointestinal involvement in post-acute Coronavirus disease  
792 (COVID)-19 syndrome. *Curr Opin Infect Dis.* 2023;36(5):366-70.  
793 <https://doi.org/10.1097/qco.0000000000000959>.
- 794 [49] Li Z, Xia Q, Feng J, Chen X, Wang Y, Ren X, et al. The causal role of gut microbiota in  
795 susceptibility of Long COVID: a Mendelian randomization study. *Front Microbiol.*  
796 2024;15:1404673. <https://doi.org/10.3389/fmicb.2024.1404673>.
- 797 [50] Su Q, Lau RI, Liu Q, Li MKT, Yan Mak JW, Lu W, et al. The gut microbiome associates with  
798 phenotypic manifestations of post-acute COVID-19 syndrome. *Cell Host Microbe.*  
799 2024;32(5):651-60.e4. <https://doi.org/10.1016/j.chom.2024.04.005>.
- 800 [51] Mussabay K, Kozhakhmetov S, Dusmagambetov M, Mynzhanova A, Nurgaziyev M,  
801 Jarmukhanov Z, et al. Gut Microbiome and Cytokine Profiles in Post-COVID Syndrome.  
802 *Viruses.* 2024;16(5). <https://doi.org/10.3390/v16050722>.
- 803 [52] Hernández-Parra H, Reyes-Hernández OD, Figueroa-González G, González-Del Carmen M,  
804 González-Torres M, Peña-Corona SI, et al. Alteration of the blood-brain barrier by COVID-19  
805 and its implication in the permeation of drugs into the brain. *Front Cell Neurosci.* 2023;17.
- 806 [53] Krasemann S, Haferkamp U, Pfefferle S, Woo MS, Heinrich F, Schweizer M, et al. The blood-  
807 brain barrier is dysregulated in COVID-19 and serves as a CNS entry route for SARS-CoV-2.  
808 *Stem Cell Reports.* 2022;17(2):307-20. <https://doi.org/10.1016/j.stemcr.2021.12.011>.
- 809 [54] Aceti A, Margarucci LM, Scaramucci E, Orsini M, Salerno G, Di Sante G, et al. Serum S100B  
810 protein as a marker of severity in Covid-19 patients. *Scientific Reports.* 2020;10(1):18665.  
811 <https://doi.org/10.1038/s41598-020-75618-0>.
- 812 [55] Fonseca DLM, Filgueiras IS, Marques AHC, Vojdani E, Halpert G, Ostrinski Y, et al. Severe  
813 COVID-19 patients exhibit elevated levels of autoantibodies targeting cardiolipin and platelet  
814 glycoprotein with age: a systems biology approach. *npj Aging.* 2023;9(1):21.  
815 <https://doi.org/10.1038/s41514-023-00118-0>.
- 816 [56] Liu WY, Wang ZB, Zhang LC, Wei X, Li L. Tight junction in blood-brain barrier: an overview of  
817 structure, regulation, and regulator substances. *CNS Neurosci Ther.* 2012;18(8):609-15.  
818 <https://doi.org/10.1111/j.1755-5949.2012.00340.x>.
- 819 [57] Stuart CM, Varatharaj A, Winberg ME, Galea P, Larsson HBW, Cramer SP, et al. Zonulin and  
820 blood-brain barrier permeability are dissociated in humans. *Clin Transl Med.*  
821 2022;12(7):e965. <https://doi.org/10.1002/ctm2.965>.
- 822 [58] Nahar S, Hokama A, Fujita J. Clinical significance of cytomegalovirus and other herpes virus  
823 infections in ulcerative colitis. *Pol Arch Intern Med.* 2019;129(9):620-6.  
824 <https://doi.org/10.20452/pamw.14835>.
- 825 [59] Nahar S, Iraha A, Hokama A, Uehara A, Parrott G, Ohira T, et al. Evaluation of a multiplex PCR  
826 assay for detection of cytomegalovirus in stool samples from patients with ulcerative colitis.  
827 *World J Gastroenterol.* 2015;21(44):12667-75. <https://doi.org/10.3748/wjg.v21.i44.12667>.
- 828 [60] Mousset S, Martin H, Berger A, Heß S, Bug G, Kriener S, et al. Human herpesvirus 6 in  
829 biopsies from patients with gastrointestinal symptoms after allogeneic stem cell  
830 transplantation. *Ann Hematol.* 2012;91(5):737-42. <https://doi.org/10.1007/s00277-011-1354-5>.
- 831

- 832 [61] Maes M, Ringel K, Kubera M, Anderson G, Morris G, Galecki P, et al. In myalgic  
833 encephalomyelitis/chronic fatigue syndrome, increased autoimmune activity against 5-HT is  
834 associated with immuno-inflammatory pathways and bacterial translocation. *Journal of*  
835 *Affective Disorders*. 2013;150(2):223-30.  
836 <https://doi.org/https://doi.org/10.1016/j.jad.2013.03.029>.
- 837 [62] Maes M, Simeonova D, Stoyanov D, Leunis JC. Upregulation of the nitrosylome in bipolar  
838 disorder type 1 (BP1) and major depression, but not BP2: Increased IgM antibodies to  
839 nitrosylated conjugates are associated with indicators of leaky gut. *Nitric Oxide*. 2019;91:67-  
840 76. <https://doi.org/10.1016/j.niox.2019.07.003>.
- 841 [63] English J, Connolly L, Stewart LD. Increased Intestinal Permeability: An Avenue for the  
842 Development of Autoimmune Disease? *Exposure and Health*. 2024;16(2):575-605.  
843 <https://doi.org/10.1007/s12403-023-00578-5>.
- 844 [64] Thisayakorn P, Thipakorn Y, Tantavisut S, Sirivichayakul S, Vojdani A, Maes M. Increased IgA-  
845 mediated responses to the gut paracellular pathway and blood-brain barrier proteins predict  
846 delirium due to hip fracture in older adults. *Front Neurol*. 2024;15:1294689.  
847 <https://doi.org/10.3389/fneur.2024.1294689>.
- 848 [65] Cusick MF, Libbey JE, Fujinami RS. Molecular mimicry as a mechanism of autoimmune  
849 disease. *Clin Rev Allergy Immunol*. 2012;42(1):102-11. [https://doi.org/10.1007/s12016-011-](https://doi.org/10.1007/s12016-011-8294-7)  
850 [8294-7](https://doi.org/10.1007/s12016-011-8294-7).
- 851 [66] Oldstone MB. Molecular mimicry and autoimmune disease. *Cell*. 1987;50(6):819-20.  
852 [https://doi.org/10.1016/0092-8674\(87\)90507-1](https://doi.org/10.1016/0092-8674(87)90507-1).
- 853 [67] McRae BL, Vanderlugt CL, Dal Canto MC, Miller SD. Functional evidence for epitope  
854 spreading in the relapsing pathology of experimental autoimmune encephalomyelitis. *J Exp*  
855 *Med*. 1995;182(1):75-85. <https://doi.org/10.1084/jem.182.1.75>.
- 856 [68] Fujinami RS, Oldstone MB, Wroblewska Z, Frankel ME, Koprowski H. Molecular mimicry in  
857 virus infection: crossreaction of measles virus phosphoprotein or of herpes simplex virus  
858 protein with human intermediate filaments. *Proc Natl Acad Sci U S A*. 1983;80(8):2346-50.  
859 <https://doi.org/10.1073/pnas.80.8.2346>.
- 860 [69] Scherer MT, Ignatowicz L, Winslow GM, Kappler JW, Marrack P. Superantigens: bacterial and  
861 viral proteins that manipulate the immune system. *Annu Rev Cell Biol*. 1993;9:101-28.  
862 <https://doi.org/10.1146/annurev.cb.09.110193.000533>.

863

864

865

866

867

868

869

870

871

872



873 **Figure ligands**

874 **Figure 1** Results of neural network analysis showing the importance chart. The output  
875 variable is the diagnosis of Long COVID. Input variables are LPS: lipopolysaccharides;  
876 ZOOC: zonulin and occludin.

877 **Figure 2** Results of neural network analysis showing the importance chart. The output  
878 variable is the diagnosis of Long COVID. Input variables are HHV6: Human Herpes Virus 6,  
879 HHV6dP: HHV-6 duTPase; LPS: lipopolysaccharides; ZOOC: zonulin and occludin; SARS-  
880 CoV-2: Severe Acute Respiratory Syndrome Coronavirus 2.

881 **Figure 3** Results of neural network analysis showing the importance chart. The output  
882 variable is the diagnosis of Long COVID. Input variables are HHV6: Human Herpes Virus 6,  
883 HHV6dP: HHV-6 duTPase; BBB: blood brain barrier proteins; MOG: myelin  
884 oligodendrocyte glycoprotein; ZOOC: zonulin and occludin; cerebellar: Cerebellar protein-2;  
885 MBP: myelin basic protein; SARS-CoV-2: Severe Acute Respiratory Syndrome Coronavirus  
886 2; LPS: lipopolysaccharides.

887 **Figure 4** Partial regression of the physio-affective phenome of Long COVID (Comp\_PP)  
888 score on IgG directed to zonulin and occludin (ZOOC); after adjustment for age, sex, and  
889 body mass index ( $p < 0.001$ ).

890 **Figure 5** Results of neural network analysis with autoimmunity directed to myelin basic  
891 protein as output variable. Input variables are ZOOC: zonulin and occludin; LPS:  
892 lipopolysaccharides; HHV6: Human Herpes Virus 6, HHV6dP: HHV-6 duTPase; SARS-  
893 CoV-2: Severe Acute Respiratory Syndrome Coronavirus 2.

894 **Figure 6** Results of neural network analysis with autoimmunity directed to zonulin and  
895 occludin as output variable. Input variables are LPS: lipopolysaccharides; HHV6: Human  
896 Herpes Virus 6, HHV6dP: HHV-6 duTPase; SARS-CoV-2: and Severe Acute Respiratory  
897 Syndrome Coronavirus 2.

898 **Figure 7** Results of Partial Least Squares analysis with the physio-affective phenome of  
899 Long COVID as final outcome variables. Input variables are C-reactive protein (CRP) levels,  
900 and autoimmunity to myelin basic protein (MBP); zonulin + occludin (ZOOC).  
901 HHV6: Human Herpes Virus 6, HHV6dP: HHV-6 duTPase; and SARS-CoV-2: Severe Acute  
902 Respiratory Syndrome Coronavirus 2. A multiple mediating model is constructed whereby  
903 HHV6 reactivation and autoimmunity to ZOOC and MBP may mediate the effects of SARS-  
904 CoV-2 infection. Shown are the explained variances (figures in blue circles), and path  
905 coefficients with exact p-value. The model shows only the significant pathways.

906

907

908

909

910

911

912

913

914

915

916

917

918

919

920

921

922

923

924

925

**Table 1.** Results of binary logistic regression analysis with the diagnosis Long COVID as dependent variable (healthy controls as reference group).

| Regression Number                                                      | Explanatory Variables | B      | SE    | Wald  | P      | OR   | 95% CI      |
|------------------------------------------------------------------------|-----------------------|--------|-------|-------|--------|------|-------------|
| 1                                                                      | IgA LPS               | 0.209  | 0.155 | 1.81  | 0.179  | 1.23 | 0.91; 1.67  |
| 2                                                                      | IgM LPS               | -0.413 | 0.255 | 2.63  | 0.105  | 0.66 | 0.40; 1.09  |
| 3                                                                      | IgG LPS               | 0.018  | 0.213 | 0.01  | 0.932  | 0.98 | 0.65; 1.49  |
| 4                                                                      | IgA ZOOC              | 0.711  | 0.251 | 8.05  | 0.005  | 2.04 | 1.25; 3.33  |
| 5                                                                      | IgM ZOOC              | 0.649  | 0.234 | 7.70  | 0.006  | 1.91 | 1.21; 3.03  |
| 6                                                                      | IgG ZOOC              | 1.678  | 0.392 | 18.37 | <0.001 | 5.35 | 2.49; 11.53 |
| <b>BEST PREDICTION USING ALL IgA/IgG/IgM responses to LPS and ZOOC</b> |                       |        |       |       |        |      |             |
| 7                                                                      | IgA ZOOC              | 0.430  | 0.218 | 3.90  | 0.048  | 1.54 | 1.01; 2.36  |
|                                                                        | IgG ZOOC              | 1.603  | 0.390 | 16.90 | <0.001 | 4.97 | 2.31; 10.66 |

OR: Odd's ratio, 95 CI: 95% confidence intervals, Ig: Immunoglobulin; LPS: lipopolysaccharides; ZOOC: zonulin and occludin.

**Table 2.** Results of neural networks (NN) with Long COVID disease and healthy controls as output variables and IgA/IgM/IgG responses to lipopolysaccharides (LPS), zonulin and occludin (ZOOC) with or without other Ig responses to viral and neuronal antigens as input variables.

|                         | <b>Network information</b>        | <b>NN#1</b>                 | <b>NN#2</b>                                 | <b>NN#3</b>                                           |
|-------------------------|-----------------------------------|-----------------------------|---------------------------------------------|-------------------------------------------------------|
| <b>Hidden layers</b>    | Number of hidden layers           | 2                           | 2                                           | 2                                                     |
|                         | Activation function               | Hyperbolic tangent          | Hyperbolic tangent                          | Hyperbolic tangent                                    |
|                         | Number of units in hidden layer 1 | 4                           | 6                                           | 6                                                     |
|                         | Number of units in hidden layer 2 | 3                           | 5                                           | 5                                                     |
| <b>Input variables</b>  | Explanatory variables             | IgA/IgM/IgG to LPS and ZOOC | IgA/IgM/IgG to LPS, ZOOC and viral antigens | IgA/IgM/IgG to LPS, ZOOC, viral and neuronal antigens |
| <b>Output variables</b> | Dependent variables               | LC versus controls          | LC versus controls                          | LC versus controls                                    |
| <b>Output layer</b>     | Number of units                   | 2                           | 2                                           | 2                                                     |
|                         | Activation function               | Identity                    | Identity                                    | Identity                                              |
| <b>Training</b>         | Error term (sum of squares)       | 17.933                      | 18.634                                      | 12.539                                                |
|                         | Percent incorrect                 | 29.5%                       | 24.6%                                       | 12.5%                                                 |
| <b>Testing</b>          | Sum of Squares error              | 8.014                       | 10.498                                      | 7.532                                                 |
|                         | Percent incorrect                 | 31.7%                       | 22.6%                                       | 17.9%                                                 |
| <b>Holdout</b>          | Percent incorrect                 | 33.3%                       | 22.6%                                       | 10.2%                                                 |
| <b>ROC curve</b>        | AUC                               | 0.755                       | 0.863                                       | 0.947                                                 |



**Table 3.** Results of multiple regression analysis with a composite phenome (Comp\_PP) score as dependent variable and immunoglobulins (Ig) directed against lipopolysaccharides (LPS), zonulin and occludin (ZOOC), and neuronal proteins, levels of C-reactive protein (CRP), and advanced oxidative protein products (AOPP) as explanatory variables.

| Dependent Variables | Explanatory Variables              | Coefficients of input variables |                       |                          | Model statistics |       |      |        |
|---------------------|------------------------------------|---------------------------------|-----------------------|--------------------------|------------------|-------|------|--------|
|                     |                                    | B                               | t                     | p                        | R <sup>2</sup>   | F     | df   | p      |
| #1. Comp_PP         | Model<br>IgG ZOOC                  | 0.368                           | 3.31                  | 0.001                    | 0.135            | 10.95 | 1/70 | 0.001  |
| #2. Comp_PP         | Model<br>CRP<br>IgG ZOOC           | 0.487<br>0316                   | 5.06<br>3.29          | <0.001<br>0.002          | 0.369            | 20.21 | 2/69 | <0.001 |
| #3. Comp_PP         | Model<br>CRP<br>IgG MBP<br>IgA MBP | 0.500<br>0.308<br>0.203         | 5.25<br>3.30<br>0.203 | <0.001<br>0.002<br>0.037 | 0.416            | 15.15 | 3/68 | <0.001 |

MBP: Myelin basic protein

**Table 4.** Results of neural networks (NN) with IgA/IGM/IgG directed against myelin basic protein (MBP), or zonulin and occludin (ZOOC) as dependent variables.

|                         | <b>Models</b>                     | <b>NN#1</b>                                  | <b>NN#2</b>                   |
|-------------------------|-----------------------------------|----------------------------------------------|-------------------------------|
| <b>Hidden layers</b>    | Number of hidden layers           | 2                                            | 2                             |
|                         | Activation function               | Hyperbolic tangent                           | Hyperbolic tangent            |
|                         | Number of units in hidden layer 1 | 5                                            | 7                             |
|                         | Number of units in hidden layer 2 | 4                                            | 5                             |
| <b>Output variables</b> | Dependent variables               | MBP                                          | ZOOC                          |
| <b>Input variables</b>  | Predictor variables               | IgA/IGM/IgG to ZOOC, LPS, and viral antigens | IgA/IGM/IgG to viral antigens |
| <b>Output layer</b>     | Number of units                   | 1                                            | 1                             |
|                         | Activation function               | Identity                                     | Identity                      |
| <b>Training</b>         | Error term (sum of squares)       | 16.264                                       | 22.311                        |
|                         | relative error                    | 0.452                                        | 0.465                         |
| <b>Testing</b>          | Sum of Squares error              | 4.626                                        | 8.309                         |
|                         | relative error                    | 0.442                                        | 0.501                         |
| <b>Holdout</b>          | relative error                    | 0.541                                        | 0.647                         |
|                         | r value (predicted vs observed)   | 0.750                                        | 0.719                         |



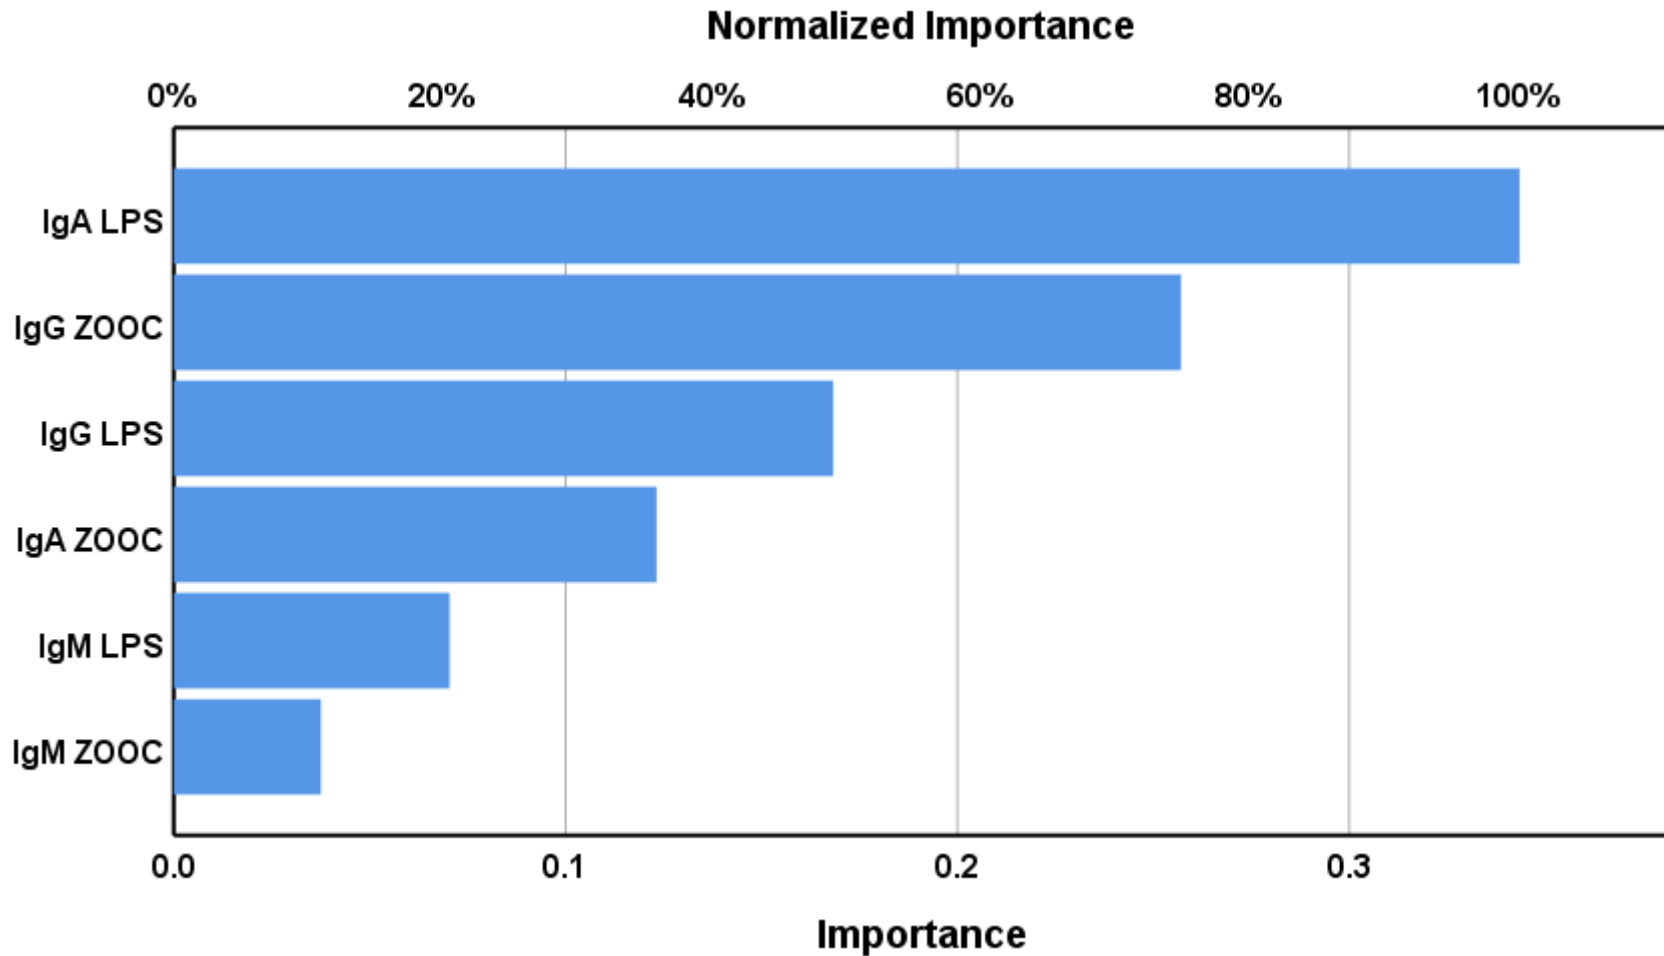

**Figure 1** Results of neural network analysis showing the importance chart. The output variables are the diagnosis of Long COVID and healthy controls. Input variables are immune responses to lipopolysaccharides (LPS) and zonulin and occludin (ZOOC).

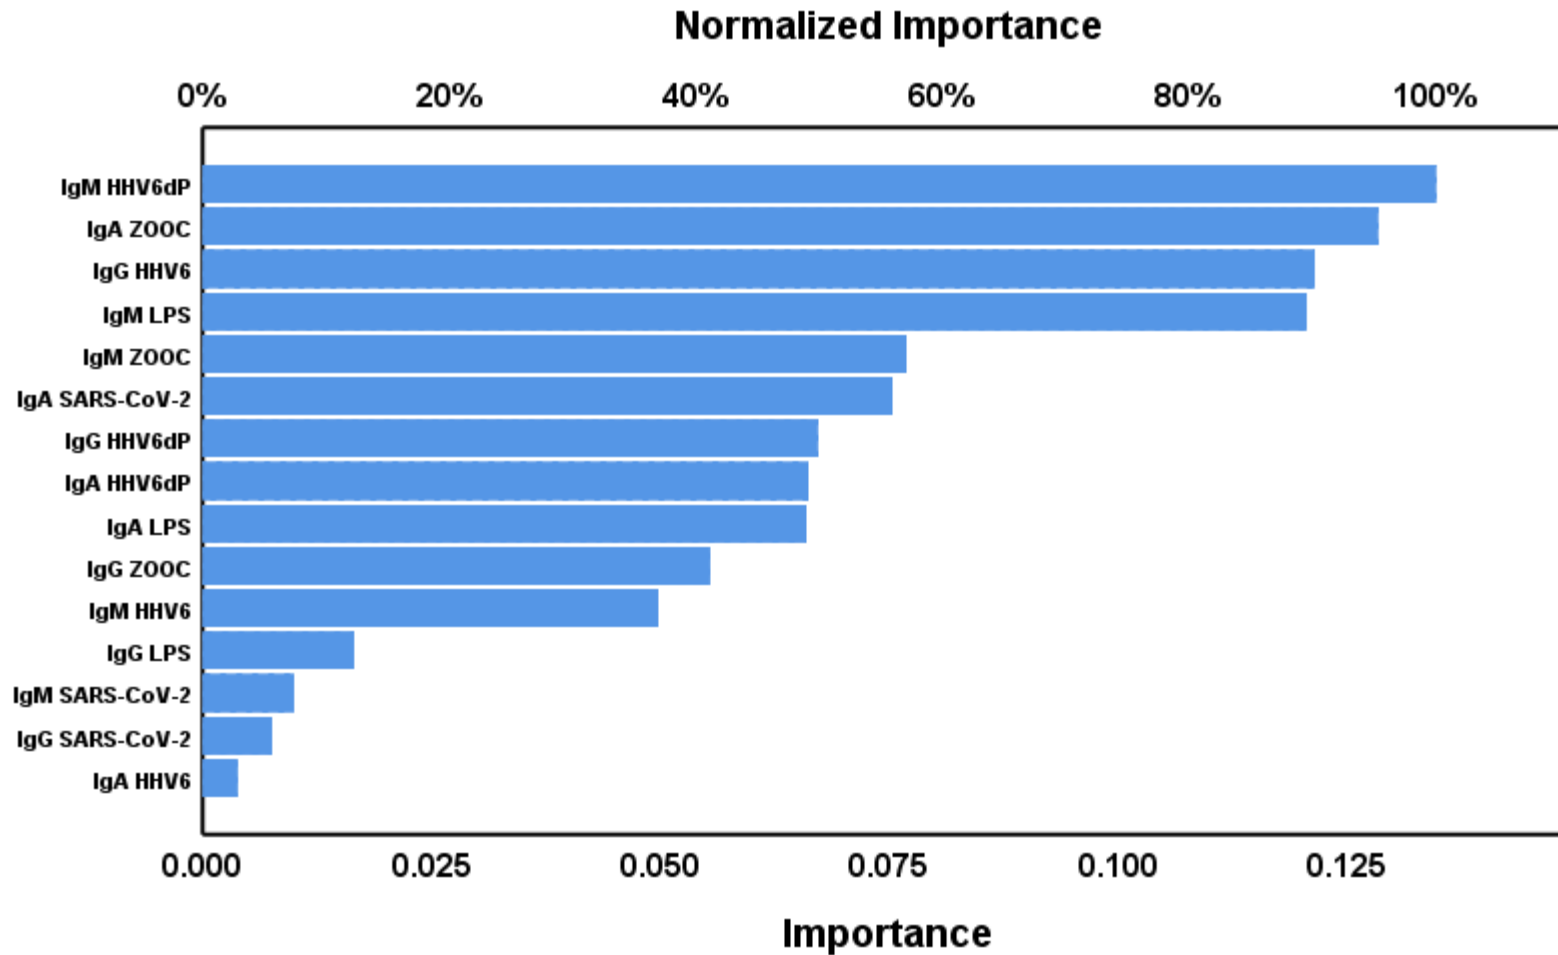

**Figure 2.** Results of neural network analysis showing the importance chart. The output variables are the diagnosis of Long COVID and healthy controls. Input variables are HHV-6: Human Herpes Virus 6, HHV6dP: HHV-6 duTPase; LPS: lipopolysaccharides; ZOOC: zonulin and occludin; SARS-CoV-2: Severe Acute Respiratory Syndrome Coronavirus 2.

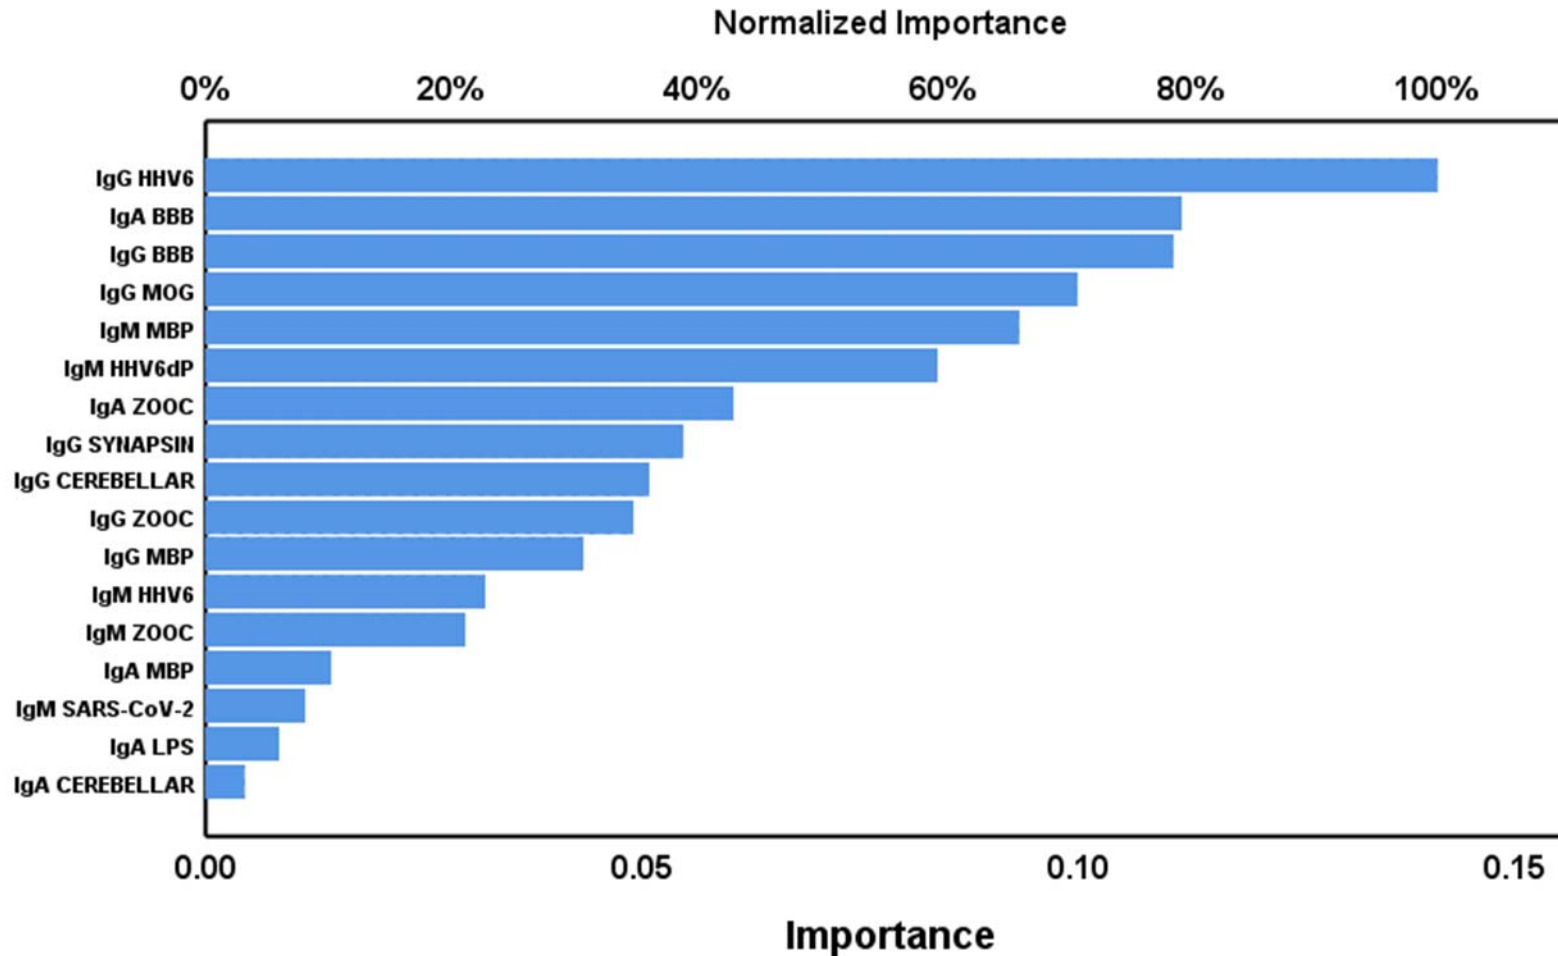

**Figure 3** Results of neural network analysis showing the importance chart. The output variables are the diagnosis of Long COVID and healthy controls. Input variables are HHV6: Human Herpes Virus 6, HHV6dP: HHV-6 duTPase; BBB: blood brain barrier proteins; MOG: myelin oligodendrocyte glycoprotein; ZOOC: zonulin and occludin; cerebellar: Cerebellar protein-2; MBP: myelin basic protein; SARS-CoV-2: Severe Acute Respiratory Syndrome Coronavirus 2; LPS: lipopolysaccharides.

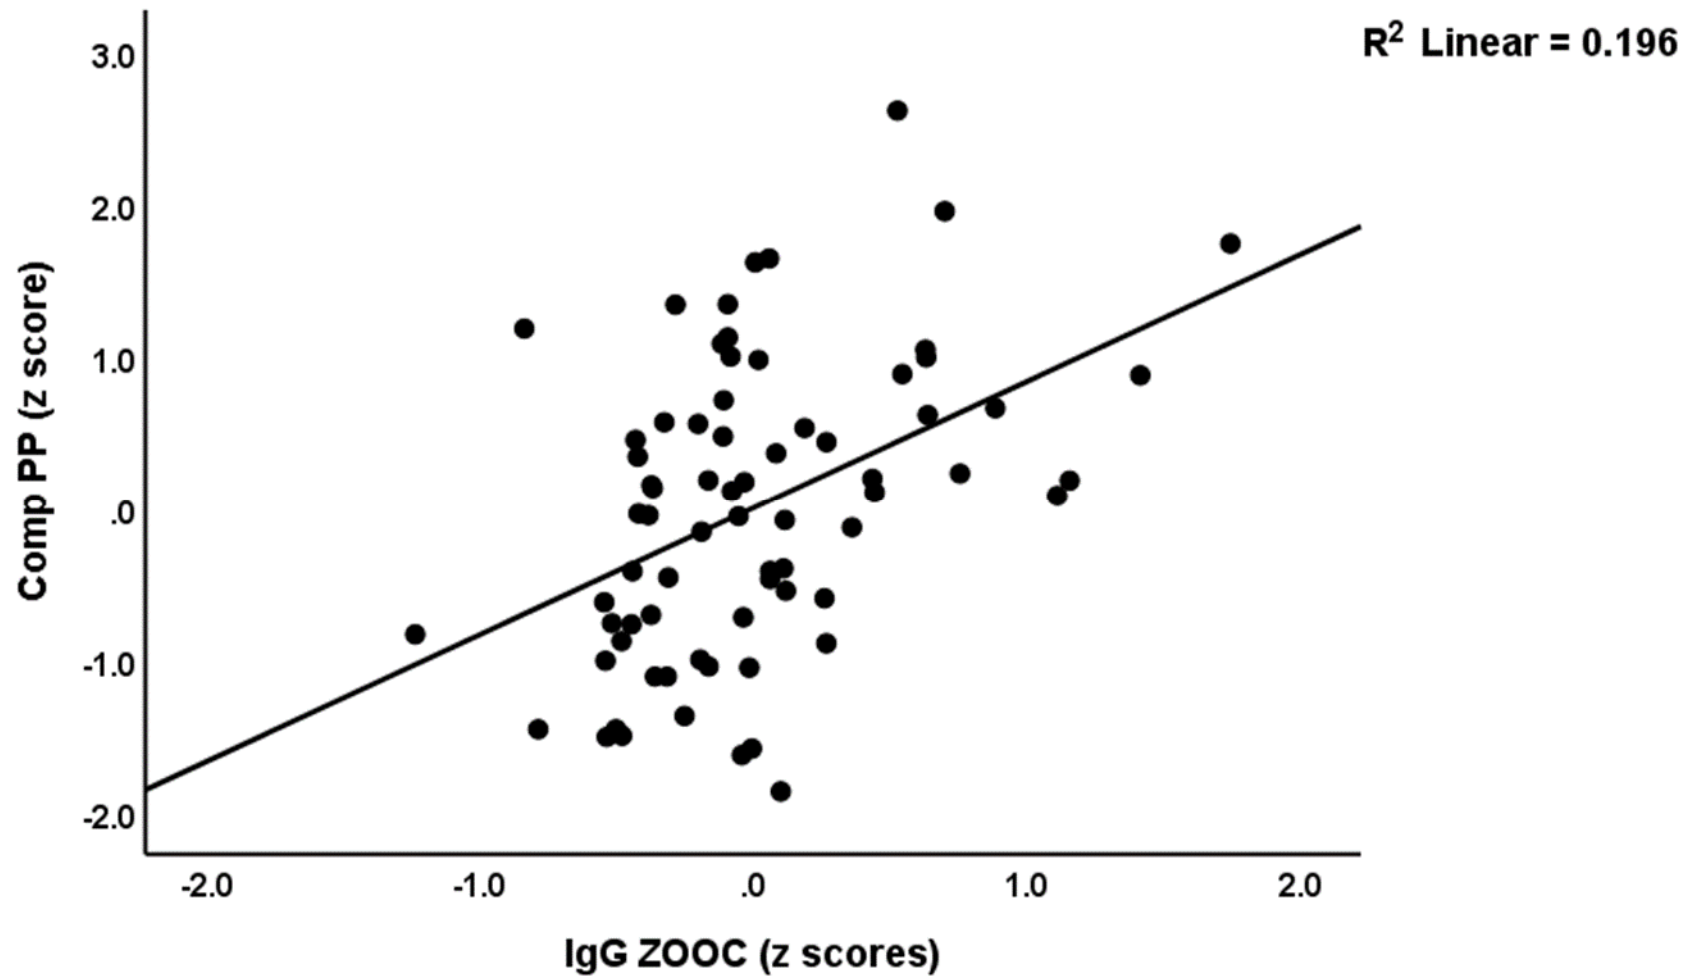

**Figure 4** Partial regression of the physio-affective phenome of Long COVID (Comp\_PP) score on IgG directed against zonulin and occludin (ZOOC); after adjustment for age, sex, and body mass index ( $p < 0.001$ ).

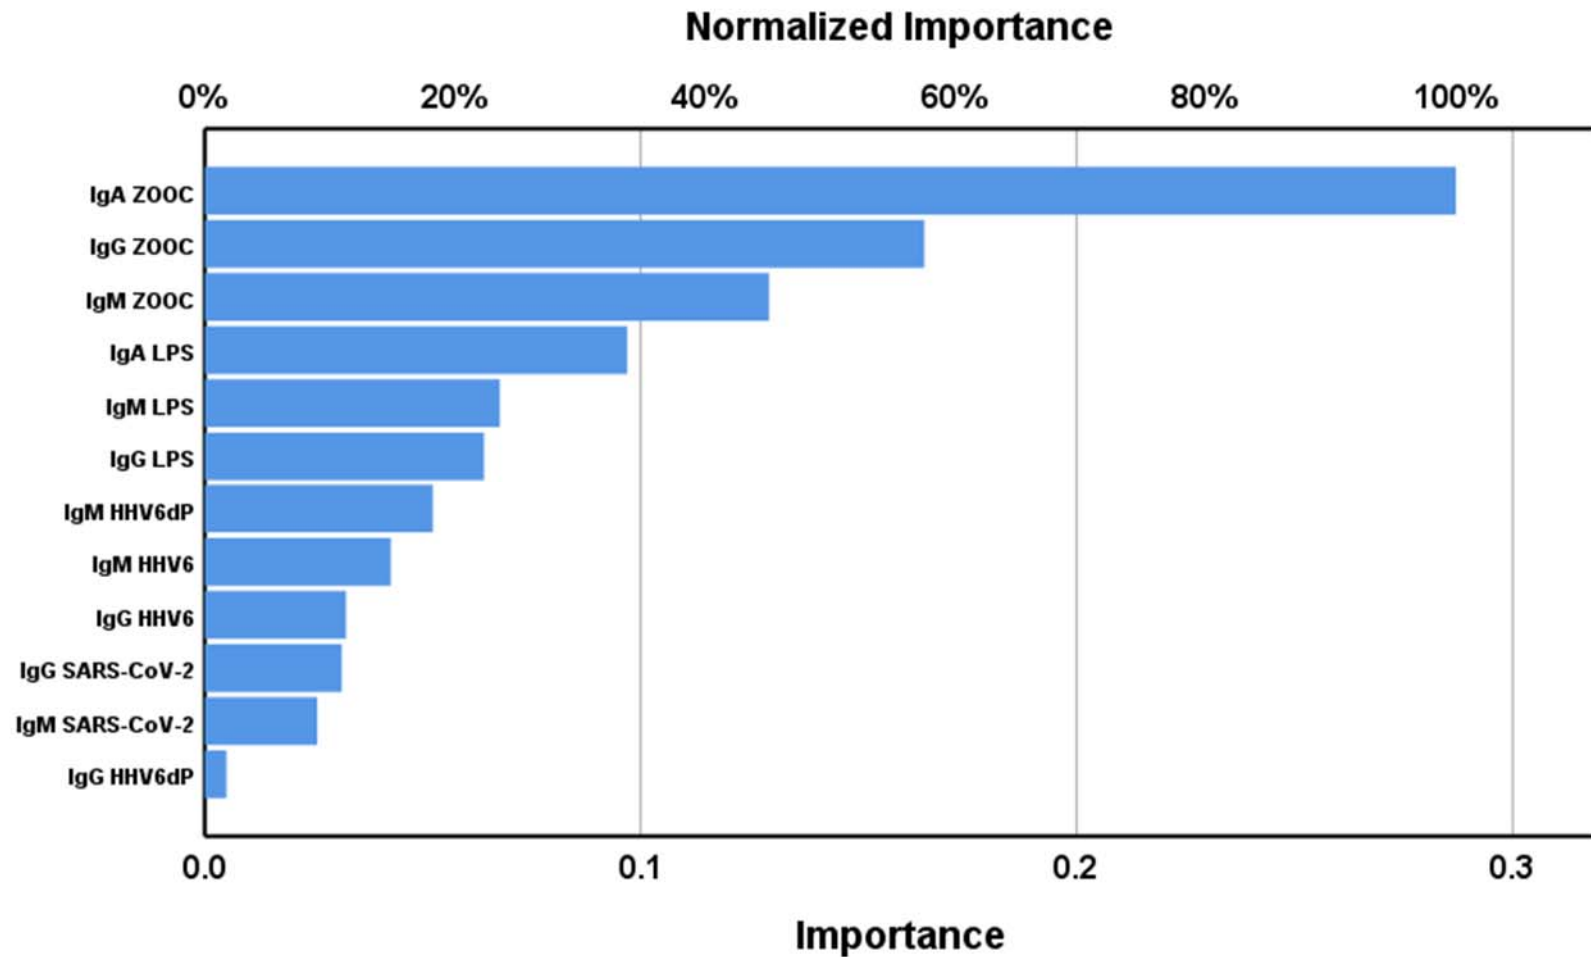

**Figure 5** Results of neural network analysis with autoimmunity directed to myelin basic protein as output variable. Input variables are Z00C: zonulin and occludin; LPS: lipopolysaccharides; HHV6: Human Herpes Virus 6, HHV6dP: HHV-6 duTPase; SARS-CoV-2: and Severe Acute Respiratory Syndrome Coronavirus 2.

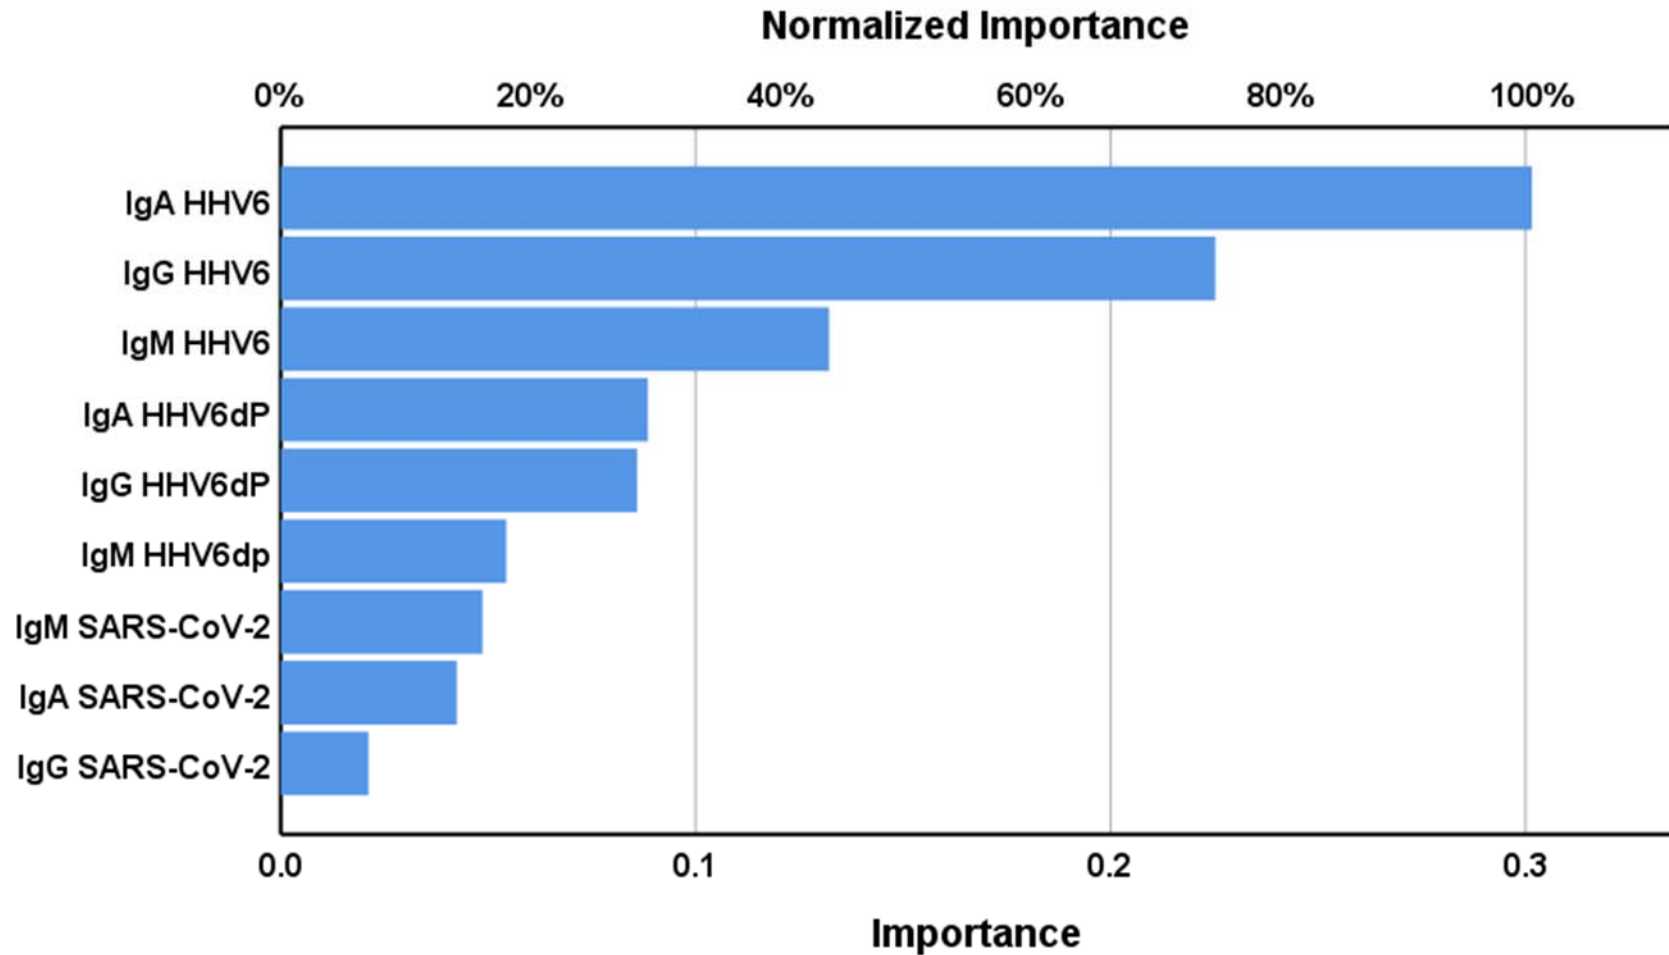

**Figure 6** Results of neural network analysis with autoimmunity directed to zonulin and occludin as output variable. Input variables are LPS: lipopolysaccharides; HHV6: Human Herpes Virus 6, HHV6dP: HHV-6 duTPase; SARS-CoV-2: and Severe Acute Respiratory Syndrome Coronavirus 2.

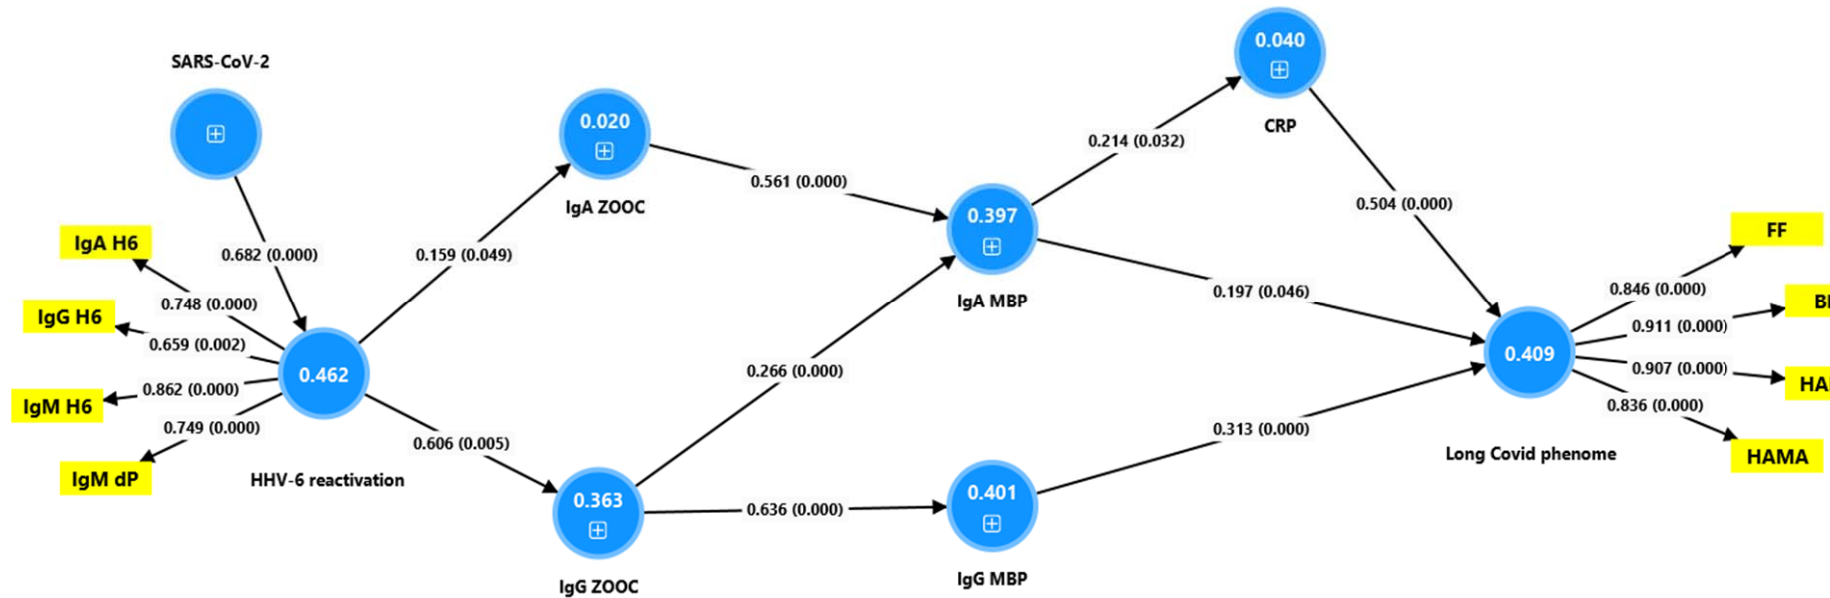

**Figure 7.** Results of Partial Least Squares analysis with the physio-affective phenome of Long COVID as final outcome variable. Input variables are C-reactive protein (CRP) levels, and autoimmunity to myelin basic protein (MBP); zonulin + occludin (ZOOC); HHV6: Human Herpes Virus 6, HHV6dP: HHV-6 duTPase; and SARS-CoV-2: Severe Acute Respiratory Syndrome Coronavirus 2. A multiple mediating model is constructed whereby HHV-6 reactivation and autoimmunity to ZOOC and MBP may mediate the effects of SARS-CoV-2 infection. Shown are the explained variances (figures in blue circles), and path coefficients with exact p-value. The model shows only the significant pathways.
